# TLR4/NF- $\kappa$ B Signaling Contributes to the Inflammation in Ovary and Inguinal Fats of Polycystic Ovary Syndrome

1 **Bo Sun<sup>1</sup>✉, Zimeng Pan<sup>2</sup>✉, Hongying Kuang<sup>3</sup>, Xiaoling Feng<sup>3</sup>, Lihui Hou<sup>3</sup>, Fang Xu<sup>3</sup>, Feifei**  
2 **Song<sup>4</sup>, Miao Sun<sup>3</sup>\***

3 <sup>1</sup>Department of Biochemistry and Molecular Medicine, University of California at Davis,  
4 Sacramento, USA

5 <sup>2</sup>Department of First Clinical Medical College, Heilongjiang University of Chinese Medicine,  
6 Harbin, China

7 <sup>3</sup>Department of Obstetrics and Gynecology, First Affiliated Hospital, Heilongjiang University of  
8 Chinese Medicine, Harbin, China

9 <sup>4</sup>Department of Pediatrics, The Fifth Affiliated Hospital of Southern Medical University, Guangzhou,  
10 China

11 ✉These authors contributed equally to this work.

12 \* **Correspondence:**

13 Miao Sun

14 sunmiao82@163.com

15 **Keywords: polycystic ovary syndrome, inflammation, TLR4/NF- $\kappa$ B signaling, ovary, inguinal**  
16 **fats, mechanism, letrozole, different time points.**

17 **Abstract**

18 **Background.** Polycystic ovary syndrome (PCOS) is a complex reproductive endocrine disorder. It  
19 has highly heterogeneous clinical manifestations which are characterized by biochemical  
20 hyperandrogenemia, obesity, insulin resistance, dyslipidemia, anovulation, and polycystic ovaries.  
21 However, the etiologies of PCOS are still unclear. Recently, studies have found that the low-grade  
22 inflammation contributed to the occurrence of PCOS, and as a critical biomarker indicated the  
23 endocrine disruptions in PCOS. **Objective.** This study is aimed to investigate the processes and  
24 mediators of inflammation in contributing to the development of PCOS. **Methods.** Letrozole (LET)  
25 induced PCOS rat model was used in this study. Body weight, body temperature, inguinal fats  
26 weight, fasting glucose level, ovarian morphology, NF- $\kappa$ B signaling target genes in ovary, and  
27 protein expression levels of TLR4 and NF- $\kappa$ B in ovarian and inguinal fats were measured in rats with  
28 placebo and LET administrations for 6 and 12 weeks. **Results.** PCOS rats, especially with LET  
29 intervention for 12 weeks, had higher body weight, inguinal fats weight and fasting glucose level  
30 compared to control group. The protein expression levels of TLR4 and NF- $\kappa$ B in cytoplasm of  
31 ovarian and inguinal fats were increased in LET-induced PCOS rats compared to control groups,  
32 while NF- $\kappa$ B in nucleus were reduced in PCOS rats. The expressions of ACTB, C3, CXCL3, NQO1  
33 and SELP in ovarian were statistically different in PCOS rats induced by LET compared to control  
34 groups. **Conclusion.** These findings indicated that stimulating TLR4/NF- $\kappa$ B pathway in inguinal fats  
35 and ovary tissues contributed to the increased inflammation in LET-induced PCOS rats, which, in  
36 turn, exacerbated the phenotype of PCOS including weight gain, adipose tissue accumulation,  
37 hyperglycemia and follicular dysplasia.

## 38 1 Introduction

39 Polycystic ovary syndrome (PCOS) is the most common endocrine disorder which affects 4%-20%  
40 women of reproductive age in the worldwide [1]. It is characterized by biochemical and/or clinical  
41 hyperandrogenemia, chronic anovulation, and polycystic ovaries [2]. PCOS usually occurred with  
42 other accompany symptoms including insulin resistance, dyslipidemia and abdominal obesity. It  
43 contributes to increased risks of developing metabolic syndrome which is a disease covering type 2  
44 diabetes, cardiovascular diseases and hypertension [3]. PCOS severely influence the people's health  
45 and brought essential social and economic burdens. However, the underlying mechanism is still  
46 unclear.

47 Studies have found PCOS patients have higher levels of inflammatory markers (C-reactive protein,  
48 interleukin 6 [IL-6], interleukin 18 and tumor necrosis factor- $\alpha$  [TNF- $\alpha$ ]) compared with age- and  
49 BMI-matched healthy controls [4–6]. Studies suggest that chronic low-grade inflammation is  
50 associated with metabolic disorder and ovarian dysfunction in women with PCOS [7–9]. The chronic  
51 low-grade inflammation in PCOS women is found to be associated with hypertrophy adipocyte in  
52 which the compressed stromal vessels in adipose tissue causes poor blood supply leading to adipose  
53 tissue hypoperfusion and, consequently, hypoxia. Then cytokines were secreted and released in local  
54 adipose tissue [10]. Interestingly, the insulin resistance, dyslipidemia, and hyperandrogenism might  
55 be also in connection with lipid-induced proinflammatory response in PCOS [11]; study also  
56 suggests that the adipose tissue as a potential producer of these cytokines (e.g., TNF- $\alpha$ , leptin and  
57 resistin) contributing to this inflammation in PCOS [10]. Further, visceral adipose tissue contribute to  
58 maintaining this inflammation through regulating the secretions of cytokines and monocyte  
59 chemoattractant proteins, as well as recruiting more immune cells [9]. Therefore, chronic  
60 inflammation has been increasingly recognized as a critical target in studying the etiologies of PCOS.

61 PCOS can severely affect the follicle quality and oocyte maturation, in which cause infertility in  
62 women [12]. Inflammation plays an adverse effect on ovulation which are involved in premature  
63 ovarian failure, physiological aging of the ovaries and PCOS [9]. It found that the local inflammatory  
64 microenvironment in the ovary lead to abnormal follicular development and ovulation disorders [13].  
65 It is also known that the inflammation in circulation plays an adverse effect on oocytes through  
66 altering follicle microenvironment, oxidative stress and granulocyte macrophage colony stimulating  
67 factors [14]. Therefore, the development of local inflammatory in the ovary as a key in studying  
68 PCOS needs more attentions.

69 Up to now, animal PCOS models have been developed efficiently with the characteristic features  
70 of PCOS; the most extensively reported is using testosterone, letrozole (LET) and estradiol valerate  
71 induced rats and mice model [15]. An animal model which can exhibit all symptoms of PCOS is the  
72 most desirable, since PCOS is a heterogeneous disease. LET is a nonsteroidal aromatase inhibitor  
73 [16], and can be administrated through oral or subcutaneous [17]. Our previous study indicated that  
74 rats with administration of LET subcutaneously for 12 weeks showed both the reproductive and  
75 metabolic alterations as PCOS patients have [18]. Although many studies have used LET-induced  
76 animal models to study the pathogenesis and pharmacological treatment related to PCOS, most of  
77 them focus on the characteristics related to the end induction of the model [19–24], and only a few  
78 experiments have been conducted to investigate the pathological mechanisms of LET-induced PCOS  
79 model animals at different time points [25,26]. Further, few studies work on investigating the  
80 regulation of inflammatory response during the pathogenesis of PCOS.

81 Therefore, this study intends to investigate the inflammatory processes and mediators that  
82 contribute to the commencement and development of PCOS across two different timepoints. By  
83 doing so it can broaden our understanding in the association between PCOS and inflammation,  
84 provide new direction on preventing and delaying the process of PCOS.

## 85 **2 Materials and Methods**

### 86 **Animals.**

87 Female Wistar rats were purchased from Experimental Animal Center of University of Heilongjiang  
88 Chinese Medicine (Harbin, China). All experimental procedures involving rats were approved by the  
89 University of Heilongjiang Chinese Medicine Animal Care and Use Committee and conformed to the  
90 Animal Welfare Act 1999. Briefly, female Wistar rats were housed under controlled conditions (21-  
91 22°C and 12 h light, 12 h dark cycle). Rats were fed on commercial chow and tap water ad libitum.  
92 On age of 21 days, female Wistar rats were randomly assigned to four groups: LET group 1 (LET1)  
93 (N=3, 200 µg/day; 60-day continuous-release LET pellets), LET group 2 (LET2) (N=3, 200 µg/day;  
94 90-day continuous-release LET pellets), control group 1 (Con1) (N=3, 200 µg/day; 60-day  
95 continuous-release placebo pellets, the main ingredient of which is starch), and control group 2  
96 (Con2) (N=3, 200 µg/day; 90-day continuous-release placebo pellets). LET (HY-14248,  
97 MedChemExpress, USA) and placebo (Innovative Research of America, USA) were implanted with  
98 subcutaneous either 60 days or 90 days continuous-release pellets (Innovative Research of America,  
99 Sarasota, FL). The 200 µg /day dose was chosen based on previous (18). The flow chart of this study  
100 is shown in Figure 1. Food intake, body weight and body temperature were measured every day and  
101 calculated weekly from the second week of implantation. Rats were culled and tissues were collected  
102 at 6 weeks of LET1 and Con1 and 12 weeks of LET2 and Con12 after pellet implantation,  
103 respectively.

### 104 **Fasting Blood Glucose Assays.**

105 Rats were fasted overnight, and 1 ml of blood was collected from the tail vein. Blood samples were  
106 centrifuged (3000 rpm, 10 min, 4°C) (Remi, C-24 BL, Mumbai, India). Glucose in serum was  
107 measured by Glucose Oxidase and Peroxidase (GOD-POD) kit according to the manufacture's  
108 instruction.

### 109 **H&E staining and Immunohistochemistry.**

110 Rats were culled by isoflurane asphyxiation for tissues collection after 6 and 12 weeks of LET  
111 administration. Ovaries and inguinal fats were collected freshly and weighed. One ovary and 0.5 cm  
112 length segment of inguinal fats were used for histology and the other ovary and last inguinal fats  
113 were stored at -80°C until processing for Western Blot. To observe ovary and fat morphology  
114 changes, hematoxylin and eosin (H&E) staining was used. Ovary and inguinal fat pads were fixed in  
115 10% neutral buffered formalin for 24h and stored in 70% ethanol before performing H&E staining  
116 and immunohistochemistry. For H&E staining, tissues were embedded in paraffine using standard  
117 techniques.

118 Ovaries and inguinal fat pads were respectively, serially sectioned at 5 µm and then stained with  
119 hematoxylin and eosin. Images were collected using Olympus DP73 microscope. For  
120 immunohistochemistry, the protocol was described according to Shaaban's study (27). Briefly, the  
121 ovary and inguinal fat sections were de-waxed, rehydrated, and performed antigen retrieval in 0.1 M

122 sodium citrate buffer for 10 min in a microwave. Sections were incubated in 3% hydrogen peroxide  
123 for 15 min to eliminate endogenous peroxidases. Sections were blocked with goat serum for 15 min  
124 at 37 °C followed by incubation overnight at 4 °C with primary antibodies Toll-like receptor 4  
125 (TLR4) (1: 200, WL00196, wanleibio, China) and nuclear factor- $\kappa$ B (NF- $\kappa$ B) (1: 200, WL01980,  
126 wanleibio, China). Following three washes in PBS, sections were incubated with biotin-labeled goat  
127 anti-rabbit IgG (H+L) (1: 500, #31460, ThermoFisher, USA) for 30 min at 37 °C. Signals were  
128 visualized by reaction with the DAB peroxidase substrate kit (DA1010, Solarbio, China). Images  
129 were collected using Olympus DP73 microscope.

### 130 **Western Bolt.**

131 30 mg ovaries and inguinal fats were respectively used for protein extraction. 40  $\mu$ g total protein per  
132 sample was loaded onto the gel. The methods and procedures were described in previous [28]. The  
133 primary antibody we used are TLR4 (1:1000, WL00196; Wanleibio, China) and NF- $\kappa$ B P65 (1:500,  
134 WL01980; Wanleibio, China). Goat anti-rabbit IgG-horseradish peroxidase (HRP) (1:5,000,  
135 WLA023; Wanleibio, China) was used as secondary antibody.  $\beta$ -actin was used to normalize the  
136 expressions of either TLR4 or NF- $\kappa$ B in each sample. The intensities of the protein signals were  
137 detected and quantified by Gel-Pro-Analyzer (WD-9413B; Liuyi Biology, China).

### 138 **qRT-PCR Array Analysis.**

139 92 related genes expression profiles were measured using rat NF- $\kappa$ B Signaling Targets qPCR Array  
140 (Supplementary TableS1) according to the manufacturer's protocol (Wcgene Biotech, Shanghai,  
141 China). Data was validated using real time quantitative reverse transcription PCR (qRT-PCR). Total  
142 RNA (1  $\mu$ g) was extracted using Trizol and proceed to reverse transcription reactions using the High  
143 Capacity cDNA Reverse Transcription kit (Applied Biosystems, Foster City, CA). qRT-PCR was  
144 performed on a 7900HT Sequence Detection system (Applied Biosystems) using FastStart Universal  
145 SYBR Green Master kit (Roche Diagnostics, Indianapolis, IN) following the manufacturer's  
146 instructions. GAPDH was used as a housekeeping gene. Each test was done in triple replication and  
147 the  $2^{-\Delta\Delta C_t}$  method was used to calculate the expressions of genes. Data were analyzed using Wcgene  
148 Biotech software. Genes with fold-changes more than or less than 2.0 were considered to be of  
149 biological significance.

### 150 **Statistical Analysis.**

151 Social sciences (SPSS version 21.0; SPSS, Chicago, IL) and Prism GraphPad (version 6.00,  
152 GraphPad Software, La Jolla, CA) were used for testing the statistical difference. Differences  
153 between controls and rats exposed to LET were assessed by one-way ANOVA after Dunnett's post  
154 hoc test. The differences of body weight, body temperature and food intake between groups were  
155 analyzed by repeated-measures ANOVA. Values are mean  $\pm$  S.E.M.  $P < 0.05$  was defined as the  
156 threshold of significant.

## 157 **3 Results**

### 158 **Body Weight Accumulation and Temperature Changes.**

159 The continuously released pellet containing placebo or LET were implanted subcutaneously at age of  
160 21 day. The accumulation of body weight was recorded for 6 weeks and 12 weeks as shown in Figure  
161 2A. Significantly increased body weight was observed in rats at 5 and 6 weeks after LET

162 implantation (Con1 vs LET1,  $P < 0.05$ ). In addition, the body weight of LET2 group were increased  
163 compared with the Con 2 group during 7-12 weeks,  $P < 0.05$ . Further, the changes of body  
164 temperature were fluctuated in the Con1 and Con2 groups, while the body temperature of LET2 rats  
165 were lower than Con2 group at the 7th, 8th and 9th week (Con2 vs LET2,  $P < 0.05$ ), as shown in  
166 Figure 2B.

### 167 **Inguinal Fats Weight and Fasting Blood Glucose Level.**

168 The weights of inguinal fats tissue in four groups were compared and shown in Figure 3A. The  
169 weight of inguinal fats was increased as the treatment going (Con1 vs Con2,  $P < 0.05$ ). In addition,  
170 the weight of inguinal fats in rats at 6 and 12 weeks of LET implantation was higher than control  
171 group at the same period (Con1 vs LET1,  $P < 0.05$ ; Con2 vs LET2,  $P < 0.001$ ), and the inguinal fats  
172 weight at 12 weeks of LET implantation was higher than that at 6 weeks ( $P < 0.001$ ). This suggested  
173 that the pathological state of PCOS was associated with the increased inguinal fats tissue weight. As  
174 the severity of PCOS increased, inguinal fats tissue also gradually got weight.

175 Figure 3B showed the fasting blood glucose level of the four groups. The fasting blood glucose  
176 level of rats at 6 and 12 weeks of LET implantation was higher than their corresponding control  
177 groups (Con1 vs LET1,  $P < 0.001$ ; Con2 vs LET2,  $P < 0.001$ ). And the fasting blood glucose level at  
178 12 weeks of LET implantation was higher than that at 6 weeks ( $P < 0.01$ ). This suggested that the  
179 risk of having glucose metabolism disorders was significantly increased in PCOS and became more  
180 severe as PCOS disease progresses.

### 181 **Ovarian Morphology Changes.**

182 More follicles were observed in the ovarian cortex of Con1, Con2 and LET1 groups compared with  
183 LET2 group (Figure 4A, B and C). Luteum was clear, cumulus and oocytes were visible, granulosa  
184 cell layers were mostly 8 ~ 9 layers and closely arranged, and mature follicles were intact without  
185 hyperemia and edema in Con1, Con2 and LET1 groups. The ovary of LET2 had cystic changes, with  
186 obvious cystic dilatation of follicles, more atresia, and reduced number of granulosa cell layers and  
187 luteal body (Figure 4 D).

### 188 **The TLR4 and NF- $\kappa$ B Protein Expression in Ovaries and Inguinal Fats.**

189 The abundance of TLR4 and NF- $\kappa$ B protein expressions in ovaries and inguinal fat tissues were  
190 measured using immunohistochemistry and western blot. We found that the intensity of TLR4 and  
191 NF- $\kappa$ B immunostaining were increased in both ovaries (Figure 5D and Figure 6D) and inguinal fat  
192 tissues (Figure 5H and Figure 6H) in LET2. Consistently, western blot showed that the relative  
193 expression of TLR4 protein in ovaries and inguinal fat tissues were increased in LET groups  
194 compared to control groups (Con1 vs LET1,  $P < 0.05$ ; Con2 vs LET2,  $P < 0.05$ , Figure 5I). And an  
195 increased expression of TLR4 was observed in LET2 compared with LET1 (LET2 vs LET1,  $P <$   
196  $0.05$ , Figure 5I). Moreover, the protein expression of NF- $\kappa$ B in cytoplasm of ovaries and inguinal fat  
197 tissues were also increased in LET groups compared to control groups (Con1 vs LET1,  $P < 0.05$ ;  
198 Con2 vs LET2,  $P < 0.05$ , Figure 6I). A greater increase in NF- $\kappa$ B expression in cytoplasm was also  
199 seen in LET2 compared to LET1 group (LET2 vs LET1,  $P < 0.05$ , Figure 6I). While the expression  
200 of NF- $\kappa$ B in nucleus was reduced in LET groups compared to their control groups in ovaries and  
201 inguinal tissues (Con1 vs LET1,  $P < 0.05$ ; Con2 vs LET2,  $P < 0.05$ , Figure 6J). What's more, there



202 was a greater decrease in NF- $\kappa$ B expression in nucleus in LET2 compared to LET1 group (LET2 vs  
203 LET1,  $P < 0.05$ , Figure 6J).

#### 204 **The PCR array of NF- $\kappa$ B signaling targets in ovary.**

205 The genes involved in the NF- $\kappa$ B signaling were investigated using qRT-PCR and the results were  
206 shown in Supplementary data (TableS2). There were significant differences in the expressions of  
207 ACTB, C3, CXCL3, NQO1, and SELP genes between groups. ACTB expression in LET2 was higher  
208 than that in LET1 (Figure 7A,  $P < 0.05$ ). The expressions of C3 (Figure 7B) and CXCL3 (Figure 7C)  
209 in LET2 were higher than that in Con2 ( $P < 0.05$ ). The expression of NQO1 in LET1 was higher than  
210 that in Con1 and LET2 (Figure 7D,  $P < 0.05$ ). The expression of SELP in LET1 was higher than that  
211 in Con1 (Figure 7E,  $P < 0.05$ ).

#### 212 **4 Discussion**

213 PCOS is a complex reproductive and endocrinal disease which the pathogenesis remains unclear. The  
214 current treatments are mainly focused on symptomatic approaches rather than curative. Importantly,  
215 exploring the pathological mechanisms of PCOS is an urgent to be addressed. Our previous study  
216 indicates that the continuous administration of LET, 200 $\mu$ g/d, to female rats for 12 weeks before  
217 puberty results in a PCOS model with both the reproductive and metabolic phenotypes [18]. This  
218 modeling method has also been used in many PCOS researches [29–31]. Recent studies indicated that  
219 increased cytokines were observed promotes in PCOS patients [32,33]. In order to further understand  
220 the association between pathological process of PCOS and inflammation, the changes of inflammatory  
221 response and metabolic characteristics in PCOS rats were investigate at 6 and 12 weeks after the LET  
222 intervention in this study. It was found that the state of high inflammatory status occurred before PCOS  
223 was developed, and this inflammation was also accompanied with obesity, accumulation of inguinal  
224 fats, hyperglycemia, and abnormal ovarian morphology. Therefore, our study indicated that a pro-  
225 inflammatory state might be an important factor in contributing to the development of PCOS.

226 TLR4 belongs to the Toll-like receptor family and expresses in a variety of cells in the body.  
227 TLR4 can initiate innate immune responses, modulate adaptive immunity, and defense against  
228 pathogens through recognition of pathogen-associated molecular patterns [34]. NF- $\kappa$ B, an important  
229 nuclear transcription factor, is a key downstream signal molecule in TLR4 signaling pathway [35], and  
230 can initiate the transcription of genes involved in the inflammation and immune responses [36]. In  
231 order to investigate the changes of inflammation during the pathogenesis of PCOS, this study examined  
232 TLR4 and NF- $\kappa$ B in ovaries and inguinal fat at different timepoints in LET-induced PCOS rats. It is  
233 known that NF- $\kappa$ B can bind to inhibitor of  $\kappa$ B (I $\kappa$ B $\alpha$ ) in the cytoplasm, but once dissociated from I $\kappa$ B $\alpha$   
234 [37,38], allowing NF- $\kappa$ B to enter the nucleus, and NF- $\kappa$ B binds to target genes' promoter regions,  
235 thereby triggering the expression of many genes involved in immune and inflammatory responses  
236 [39]. Therefore, in the present experiment, we examined the expression levels of NF- $\kappa$ B in the nucleus  
237 and cytoplasm in inguinal fats and ovarian tissues, respectively. The results revealed that high  
238 expression levels of TLR4 and NF- $\kappa$ B in cytoplasm were found in both inguinal fats and ovarian tissues  
239 of rats at either 6 or 12 weeks of LET intervention, and the expression levels were higher at 12 weeks  
240 than at 6 weeks. However, NF- $\kappa$ B in nucleus expression was low in inguinal fats and ovarian tissues  
241 at 6 and 12 weeks of LET intervention and was even lower at 12 weeks than at 6 weeks. Differentially  
242 expressed levels of NF- $\kappa$ B in nucleus and cytoplasm level may represent the activation of TLR4/NF-  
243  $\kappa$ B signaling pathway and indicate the occurrence of inflammatory responses in inguinal fats and  
244 ovarian tissues. At present, more studies have confirmed that some drugs, such as Shaoyao-Gancao

245 Decoction [40], Astragaloside IV [41] and Soy isoflavones [42], could reduce the inflammatory  
246 response in PCOS rats through modulating the NF- $\kappa$ B/TLR4 pathway; the effect is associated with  
247 altering gut microbiome structure, regulating secretion of proinflammatory cytokines and enhancing  
248 anti-inflammatory capacity. Our results also provide a theoretical basis for future drugs to treat PCOS  
249 by modulating the mechanism of TLR4/NF- $\kappa$ B in inguinal fats and ovarian tissues.

250 In PCOS patients, obesity is a common characteristic with an estimated prevalence of 49% and  
251 the risk is 2.8-fold higher among women with PCOS than healthy women [43]. As obesity is often  
252 linked to chronic low-grade inflammation, inflammation may be a contributing factor to obesity-related  
253 complications [44]. In this study, we found that the body weight of the PCOS rats was higher than that  
254 of the control group from the 5<sup>th</sup> weeks of LET intervention until 12<sup>th</sup> weeks. However, since this  
255 experiment only measured the inflammation level in the PCOS rats at 6 and 12 weeks of LET  
256 intervention, the relationship between body weight and inflammation changes during the development  
257 of PCOS could not be fully determined. But some studies have shown that inflammation was not only  
258 associated with obesity, but increased levels of neonatal systemic inflammation was reported to precede  
259 the onset of obesity [45–47]. Moreover, in the treatment of obesity, anti-inflammation has been  
260 identified as an important strategy in obesity-related metabolic syndromes [48,49]. Therefore, the  
261 interactions between obesity and low-grade inflammation during PCOS need to be further studied.

262 Oh *et al.* proposed that women with PCOS showed a "male-like" fat distributions with excessive  
263 abdominal (inguinal and visceral) fat accumulation [50]. Adipose tissue is the main source of producing  
264 cytokines [51,52]. There was growing evidence indicating obese mice on high fat diets had higher  
265 levels of inflammatory cytokines (e.g., TNF- $\alpha$ , interleukin-1 $\beta$ , IL-6) in their livers and adipose tissues  
266 [53,54]. Furthermore, hyperglycemia itself is a mediator of inflammation [55], which can also  
267 contribute to increasing inflammatory markers including TNF- $\alpha$  and IL-6 [56]. NF- $\kappa$ B can also be  
268 activated and stimulated in response to cellular stress including hyperglycemia, obesity and oxidative  
269 stress [57]. Recent studies have shown that in obese PCOS subjects, the NF- $\kappa$ B expression was higher  
270 than in lean healthy subjects [58]. Also, obesity, especially the abdominal obese phenotype, plays a  
271 significant role in activating the NF- $\kappa$ B pathway [59]. In this study, we found both higher inguinal fat  
272 and blood glucose in PCOS rats at 6 and 12 weeks of LET intervention. According to another study,  
273 excessive inguinal fat was associated with impaired organ function and chronic inflammation in obese  
274 individuals [60]. This is also consistent with the high inflammatory response we observed in the  
275 inguinal fats of PCOS rats at 6 and 12 weeks of LET intervention. Furthermore, Lionett *et al.* identified  
276 that women with PCOS had lower levels of oxidation and mitochondrial respiration in abdominal and  
277 gluteal inguinal fats than healthy women [61]. However, more studies are needed to unravel the specific  
278 pathological changes in different adipose tissues among PCOS.

279 Although the etiology of PCOS remains unknown, mounting evidence suggests that follicular  
280 dysfunction is involved in causing the infertility in women with PCOS [62]. PCOS patients have  
281 increased cystic follicles, a thickened thecal cell layer, loose arrangement of granular cells, and reduced  
282 corpus luteum; animal models of PCOS also showed similar alterations [62,63]. In this study, follicles  
283 with numerous follicular cysts were only present in the ovaries of LET2 group compared with other 3  
284 groups. In addition, the LET2 group showed no fluctuation in the body temperature of PCOS rats  
285 during 7-8 and 10-12 weeks of LET intervention, which is also an indication of poor ovulation in PCOS  
286 rats. Our study indicates that it may be related to the presence of an inflammatory microenvironment  
287 in the ovaries. In the ovary, cytokines are secreted by leukocytes, oocytes and follicular cells [64].  
288 These cytokines are involved in multiple biology processes including regulating the synthesis of  
289 gonadal steroids folliculogenesis, ovarian cells proliferation, and the function of corpus luteum

290 [65,66]. The increased inflammation in PCOS ovaries has also been reported to impact follicular  
291 growth, and TLR4/NF- $\kappa$ B activation creates an inflammatory environment in the ovary that disrupts  
292 ovulation [67]. Interestingly, the development of follicles in the LET1 group showed no different  
293 compared with control groups, although there were high expression levels of TLR4 and NF- $\kappa$ B, it may  
294 be due to the inflammation intensity and exposure time are not strong and long enough to induce an  
295 adverse effect on ovaries, which needs further research.

296 NF- $\kappa$ B plays a critical role in the initiation and resolution of inflammation [68] and can be  
297 activated and translocate into the nucleus to upregulate transcription of several inflammatory genes  
298 [69,70]. We showed, for the first time, that five differentially expressed NF- $\kappa$ B signaling target genes  
299 in ovarian tissues in LET-induced PCOS rat at two different timepoints, specifically, ACTB, C3,  
300 CXCL3, NQO1 and SELP. So far, only a few studies have explored their pathologic mechanisms in  
301 PCOS. Huang team performed cDNA microarray and qRT-PCR analysis of cumulus cells isolated  
302 from PCOS patients, and their results suggested that CXCL3 was related to oocyte nuclear maturation  
303 in PCOS patients [71,72]. In order to determine the candidate genes of PCOS, Shen et al. performed  
304 comprehensive analysis using GSE345269 microarray data which consisted of 7 granulosa cell  
305 samples of PCOS patients and 3 healthy normal granulosa cell samples [73]; it was found that ACTB  
306 were upregulated in PCOS patients but the difference was not statistically significant. The complement  
307 factor C3 is a pivotal component of inflammation; studies found an association of serum C3 and C-  
308 reactive protein (CRP) with insulin resistance in PCOS subjects [74,75]. Studies also identified that  
309 NQO1 protein expression was significantly increased in the endometrium of women with PCOS and  
310 this change was similar to those found in patients with endometrial cancer [76]. Further functional  
311 experiments will be needed to investigate the role of these genes in PCOS, which is also the main focus  
312 of our future experiments.

313 There are some limitations in this study. Samples can be collected and observed at more time  
314 points during LET intervention, such as 4 weeks and 8 weeks. On the other hand, we could analyze  
315 the inflammatory status in different tissues, such as liver, visceral fats and hypothalamus, and more  
316 comprehensively observations of the inflammatory processes in PCOS are needed to have a better  
317 understanding of how inflammation contributes to the development of PCOS.

## 318 **5 Conclusions**

319 This study, for the first time, investigate the associations of inflammation status and PCOS  
320 characteristics across two different timepoints. Activation of the TLR4/NF- $\kappa$ B pathway in inguinal  
321 fats and ovarian tissues persisted during the formation of LET-induced PCOS in rats. Moreover,  
322 ACTB, C3, CXCL3, NQO1 and SELP may be key regulatory target genes in ovarian tissue. Also, the  
323 high inflammatory state in PCOS may induce or exacerbate the phenotypic features of PCOS such as  
324 hyperglycemia, weight gain, adipose tissue accumulation and follicular dysplasia. Therefore,  
325 improving inflammation may play a critical role in preventing or attenuating PCOS. The regulation  
326 of the TLR4/NF- $\kappa$ B pathway could be new target in the prevention and treatment of PCOS.

## 327 **6 Reference**

- 328 1. Deswal R, Narwal V, Dang A, Pundir CS. The Prevalence of Polycystic Ovary Syndrome: A  
329 Brief Systematic Review. *J Hum Reprod Sci.* 2020; 13:261–271.  
330 [https://doi.org/10.4103/jhrs.JHRS\\_95\\_18](https://doi.org/10.4103/jhrs.JHRS_95_18) PMID: 33627974



- 331 2. Rudnicka E, Suchta K, Grymowicz M, Calik-Ksepka A, Smolarczyk K, Duszewska AM, et  
332 al. Chronic Low Grade Inflammation in Pathogenesis of PCOS. *Int J Mol Sci.* 2021; 22:3789.  
333 <https://doi.org/10.3390/ijms22073789> PMID: 33917519
- 334 3. Azziz R. PCOS in 2015: New insights into the genetics of polycystic ovary syndrome. *Nat*  
335 *Rev Endocrinol.* 2016; 12:183. <https://doi.org/10.1038/nrendo.2016.9> PMID: 26822926
- 336 4. Xiong Y, Liang X, Yang X, Li Y, Wei L. Low-grade chronic inflammation in the peripheral  
337 blood and ovaries of women with polycystic ovarian syndrome. *Eur J Obstet Gynecol Reprod Biol.*  
338 2011; 159:148–150. <https://doi.org/10.1016/j.ejogrb.2011.07.012> PMID: 21908093
- 339 5. Boulman N, Levy Y, Leiba R, Shachar S, Linn R, Zinder O, et al. Increased C-reactive  
340 protein levels in the polycystic ovary syndrome: a marker of cardiovascular disease. *J Clin*  
341 *Endocrinol Metab.* 2004; 89:2160–2165. <https://doi.org/10.1210/jc.2003-031096> PMID: 15126536
- 342 6. Rudnicka E, Kunicki M, Suchta K, Machura P, Grymowicz M, Smolarczyk R. Inflammatory  
343 Markers in Women with Polycystic Ovary Syndrome. *Biomed Res Int.* 2020; 2020:4092470.  
344 <https://doi.org/10.1155/2020/4092470> PMID: 32219132
- 345 7. Goswami S, Choudhuri S, Bhattacharya B, Bhattacharjee R, Roy A, Mukhopadhyay S, et al.  
346 Chronic inflammation in polycystic ovary syndrome: A case-control study using multiple markers.  
347 *Int J Reprod Biomed.* 2021; 19:313–320. <https://doi.org/10.18502/ijrm.v19i4.9057> PMID: 33997590
- 348 8. Velez LM, Seldin M, Motta AB. Inflammation and reproductive function in women with  
349 polycystic ovary syndrome†. *Biol Reprod.* 2021; 104:1205–1217.  
350 <https://doi.org/10.1093/biolre/ioab050> PMID: 33739372
- 351 9. Rostamtabar M, Esmaeilzadeh S, Tourani M, Rahmani A, Bae M, Shirafkan F, et al.  
352 Pathophysiological roles of chronic low-grade inflammation mediators in polycystic ovary syndrome.  
353 *J Cell Physiol.* 2021; 236:824–838. <https://doi.org/10.1002/jcp.29912> PMID: 32617971
- 354 10. Spritzer PM, Lecke SB, Satler F, Morsch DM. Adipose tissue dysfunction, adipokines, and  
355 low-grade chronic inflammation in polycystic ovary syndrome. *Reproduction.* 2015; 149:R219-227.  
356 <https://doi.org/10.1530/REP-14-0435> PMID: 25628442
- 357 11. González F, Considine RV, Abdelhadi OA, Acton AJ. Saturated Fat Ingestion Promotes  
358 Lipopolysaccharide-Mediated Inflammation and Insulin Resistance in Polycystic Ovary Syndrome. *J*  
359 *Clin Endocrinol Metab.* 2019; 104:934–946. <https://doi.org/10.1210/jc.2018-01143> PMID: 30590569
- 360 12. Feodor Nilsson S, Andersen PK, Strandberg-Larsen K, Nybo Andersen A-M. Risk factors for  
361 miscarriage from a prevention perspective: a nationwide follow-up study. *BJOG.* 2014; 121:1375–  
362 1384. <https://doi.org/10.1111/1471-0528.12694> PMID: 24548778
- 363 13. Pangas SA. Growth factors in ovarian development. *Semin Reprod Med.* 2007; 25:225–234.  
364 <https://doi.org/10.1055/s-2007-980216> PMID: 17594603
- 365 14. Yang Z, Tang Z, Cao X, Xie Q, Hu C, Zhong Z, et al. Controlling chronic low-grade  
366 inflammation to improve follicle development and survival. *Am J Reprod Immunol.* 2020;  
367 84:e13265. <https://doi.org/10.1111/aji.13265> PMID: 32395847

- 368 15. Corrie L, Gulati M, Singh SK, Kapoor B, Khursheed R, Awasthi A, et al. Recent updates on  
369 animal models for understanding the etiopathogenesis of polycystic ovarian syndrome. *Life Sci.*  
370 2021; 280:119753. <https://doi.org/10.1016/j.lfs.2021.119753> PMID: 34171379
- 371 16. Mamounas EP, Bandos H, Lembersky BC, Jeong J-H, Geyer CE, Rastogi P, et al. Use of  
372 letrozole after aromatase inhibitor-based therapy in postmenopausal breast cancer (NRG  
373 Oncology/NSABP B-42): a randomised, double-blind, placebo-controlled, phase 3 trial. *Lancet*  
374 *Oncol.* 2019; 20:88–99. [https://doi.org/10.1016/S1470-2045\(18\)30621-1](https://doi.org/10.1016/S1470-2045(18)30621-1) PMID: 30509771
- 375 17. Yang H, Lee SY, Lee SR, Pyun B-J, Kim HJ, Lee YH, et al. Therapeutic Effect of Ecklonia  
376 cava Extract in Letrozole-Induced Polycystic Ovary Syndrome Rats. *Front Pharmacol.* 2018; 9:1325.  
377 <https://doi.org/10.3389/fphar.2018.01325> PMID: 30524282
- 378 18. Maliqueo M, Sun M, Johansson J, Benrick A, Labrie F, Svensson H, et al. Continuous  
379 administration of a P450 aromatase inhibitor induces polycystic ovary syndrome with a metabolic  
380 and endocrine phenotype in female rats at adult age. *Endocrinology.* 2013; 154:434–445.  
381 <https://doi.org/10.1210/en.2012-1693> PMID: 23183180
- 382 19. Haslan MA, Samsulrizal N, Hashim N, Zin NSNM, Shirazi FH, Goh YM. *Ficus deltoidea*  
383 ameliorates biochemical, hormonal, and histomorphometric changes in letrozole-induced polycystic  
384 ovarian syndrome rats. *BMC Complement Med Ther.* 2021; 21:291. [https://doi.org/10.1186/s12906-](https://doi.org/10.1186/s12906-021-03452-6)  
385 [021-03452-6](https://doi.org/10.1186/s12906-021-03452-6) PMID: 34844580
- 386 20. Mihanfar A, Nouri M, Roshangar L, Khadem-Ansari MH. Ameliorative effects of fisetin in  
387 letrozole-induced rat model of polycystic ovary syndrome. *J Steroid Biochem Mol Biol.* 2021;  
388 213:105954. <https://doi.org/10.1016/j.jsbmb.2021.105954> PMID: 34298098
- 389 21. Ryan GE, Malik S, Mellon PL. Antiandrogen Treatment Ameliorates Reproductive and  
390 Metabolic Phenotypes in the Letrozole-Induced Mouse Model of PCOS. *Endocrinology.* 2018;  
391 159:1734–1747. <https://doi.org/10.1210/en.2017-03218> PMID: 29471436
- 392 22. Xu J, Dun J, Yang J, Zhang J, Lin Q, Huang M, et al. Letrozole Rat Model Mimics Human  
393 Polycystic Ovarian Syndrome and Changes in Insulin Signal Pathways. *Med Sci Monit.* 2020;  
394 26:e923073. <https://doi.org/10.12659/MSM.923073> PMID: 32638705
- 395 23. Helal BAF, Ismail GM, Nassar SE, Zeid AAA. Effect of vitamin D on experimental model of  
396 polycystic ovary syndrome in female rats. *Life Sci (2021)* 283:119558.  
397 <https://doi.org/10.1016/j.lfs.2021.119558> PMID: 33930367
- 398 24. Yang H, Lee YH, Lee SR, Kaya P, Hong E-J, Lee HW. Traditional Medicine (Mahuang-  
399 Tang) Improves Ovarian Dysfunction and the Regulation of Steroidogenic Genes in Letrozole-  
400 Induced PCOS Rats. *J Ethnopharmacol.* 2020; 248:112300.  
401 <https://doi.org/10.1016/j.jep.2019.112300> PMID: 31606536
- 402 25. Pj T, Dv S, Bs H, L S, Ar A, St K, et al. Letrozole treatment of adult female mice results in a  
403 similar reproductive phenotype but distinct changes in metabolism and the gut microbiome compared  
404 to pubertal mice. *BMC microbiology.* 2019; 19: <https://doi.org/10.1186/s12866-019-1425-7> PMID:  
405 30871463

- 406 26. Bries AE, Webb JL, Vogel B, Carrillo C, Keating AF, Pritchard SK, et al. Letrozole-Induced  
407 Polycystic Ovary Syndrome Attenuates Cystathionine- $\beta$  Synthase mRNA and Protein Abundance in  
408 the Ovaries of Female Sprague Dawley Rats. *J Nutr.* 2021; 151:1407–1415.  
409 <https://doi.org/10.1093/jn/nxab038> PMID: 33758914
- 410 27. Shaaban Z, Khoradmehr A, Amiri-Yekta A, Jafarzadeh Shirazi MR, Tamadon A.  
411 Pathophysiologic mechanisms of obesity- and chronic inflammation-related genes in etiology of  
412 polycystic ovary syndrome. *Iran J Basic Med Sci.* 2019; 22:1378–1386.  
413 <https://doi.org/10.22038/IJBMS.2019.14029> PMID: 32133054
- 414 28. Sun M, Sun B, Qiao S, Feng X, Li Y, Zhang S, et al. Elevated maternal androgen is  
415 associated with dysfunctional placenta and lipid disorder in newborns of mothers with polycystic  
416 ovary syndrome. *Fertil Steril.* 2020; 113:1275-1285.e2.  
417 <https://doi.org/10.1016/j.fertnstert.2020.02.005> PMID: 32482257
- 418 29. Ali SE, El Badawy SA, Elmosalamy SH, Emam SR, Azouz AA, Galal MK, et al. Novel  
419 promising reproductive and metabolic effects of *Cicer arietinum* L. extract on letrozole induced  
420 polycystic ovary syndrome in rat model. *J Ethnopharmacol.* 2021; 278:114318.  
421 <https://doi.org/10.1016/j.jep.2021.114318> PMID: 34111539
- 422 30. Kauffman AS, Thackray VG, Ryan GE, Tolson KP, Glidewell-Kenney CA, Semaan SJ, et al.  
423 A Novel Letrozole Model Recapitulates Both the Reproductive and Metabolic Phenotypes of  
424 Polycystic Ovary Syndrome in Female Mice. *Biol Reprod.* 2015; 93:69.  
425 <https://doi.org/10.1095/biolreprod.115.131631> PMID: 26203175
- 426 31. van Houten ELAF, Visser JA. Mouse models to study polycystic ovary syndrome: a possible  
427 link between metabolism and ovarian function? *Reprod Biol.* 2014; 14:32–43.  
428 <https://doi.org/10.1016/j.repbio.2013.09.007> PMID: 24607253
- 429 32. González F. Inflammation in Polycystic Ovary Syndrome: underpinning of insulin resistance  
430 and ovarian dysfunction. *Steroids.* 2012; 77:300–305. <https://doi.org/10.1016/j.steroids.2011.12.003>  
431 PMID: 22178787
- 432 33. Zhang C, Zhao Y, Li R, Yu Y, Yan L, Li L, et al. Metabolic heterogeneity of follicular amino  
433 acids in polycystic ovary syndrome is affected by obesity and related to pregnancy outcome. *BMC*  
434 *Pregnancy Childbirth.* 2014; 14:11. <https://doi.org/10.1186/1471-2393-14-11> PMID: 24410809
- 435 34. Dickinson SE, Wondrak GT. TLR4-directed Molecular Strategies Targeting Skin  
436 Photodamage and Carcinogenesis. *Curr Med Chem.* 2018; 25:5487–5502.  
437 <https://doi.org/10.2174/0929867324666170828125328> PMID: 28847267
- 438 35. Zhao Y, Wang H, Chen W, Chen L, Liu D, Wang X, et al. Melatonin attenuates white matter  
439 damage after focal brain ischemia in rats by regulating the TLR4/NF- $\kappa$ B pathway. *Brain Res Bull.*  
440 2019; 150:168–178. <https://doi.org/10.1016/j.brainresbull.2019.05.019> PMID: 31158461
- 441 36. Das J, Ghosh J, Manna P, Sil PC. Taurine suppresses doxorubicin-triggered oxidative stress  
442 and cardiac apoptosis in rat via up-regulation of PI3-K/Akt and inhibition of p53, p38-JNK. *Biochem*  
443 *Pharmacol.* 2011; 81:891–909. <https://doi.org/10.1016/j.bcp.2011.01.008> PMID: 21295553

- 444 37. Chen ZJ, Parent L, Maniatis T. Site-specific phosphorylation of IkappaBalpha by a novel  
445 ubiquitination-dependent protein kinase activity. *Cell*. 1996; 84:853–862.  
446 [https://doi.org/10.1016/s0092-8674\(00\)81064-8](https://doi.org/10.1016/s0092-8674(00)81064-8) PMID: 8601309
- 447 38. DiDonato J, Mercurio F, Rosette C, Wu-Li J, Suyang H, Ghosh S, et al. Mapping of the  
448 inducible IkappaB phosphorylation sites that signal its ubiquitination and degradation. *Mol Cell Biol*.  
449 1996; 16:1295–1304. <https://doi.org/10.1128/MCB.16.4.1295> PMID: 8657102
- 450 39. Barnes PJ, Karin M. Nuclear factor-kappaB: a pivotal transcription factor in chronic  
451 inflammatory diseases. *N Engl J Med*. 1997; 336:1066–1071.  
452 <https://doi.org/10.1056/NEJM199704103361506> PMID: 9091804
- 453 40. Chang Z-P, Deng G-F, Shao Y-Y, Xu D, Zhao Y-N, Sun Y-F, et al. Shaoyao-Gancao  
454 Decoction Ameliorates the Inflammation State in Polycystic Ovary Syndrome Rats via Remodeling  
455 Gut Microbiota and Suppressing the TLR4/NF-κB Pathway. *Front Pharmacol*. 2021; 12:670054.  
456 <https://doi.org/10.3389/fphar.2021.670054> PMID: 34054541
- 457 41. Leng B, Zhang Y, Liu X, Zhang Z, Liu Y, Wang H, et al. Astragaloside IV Suppresses High  
458 Glucose-Induced NLRP3 Inflammasome Activation by Inhibiting TLR4/NF-κB and CaSR.  
459 *Mediators Inflamm*. 2019; 2019:1082497. <https://doi.org/10.1155/2019/1082497> PMID: 30906223
- 460 42. Ma X, Li X, Ma L, Chen Y, He S. Soy isoflavones alleviate polycystic ovary syndrome in rats  
461 by regulating NF-κB signaling pathway. *Bioengineered*. 2021; 12:7215–7223.  
462 <https://doi.org/10.1080/21655979.2021.1979864> PMID: 34546841
- 463 43. Lim SS, Davies MJ, Norman RJ, Moran LJ. Overweight, obesity and central obesity in  
464 women with polycystic ovary syndrome: a systematic review and meta-analysis. *Hum Reprod*  
465 *Update*. 2012; 18:618–637. <https://doi.org/10.1093/humupd/dms030> PMID: 22767467
- 466 44. Xy Z, Cc S, Q L, Xy L, Li F, G L, et al. Compound LM9, a novel MyD88 inhibitor,  
467 efficiently mitigates inflammatory responses and fibrosis in obesity-induced cardiomyopathy. *Acta*  
468 *pharmacologica Sinica*. 2020; 41: <https://doi.org/10.1038/s41401-020-0410-x> PMID: 32341464
- 469 45. Singer K, Eng DS, Lumeng CN, Gebremariam A, M Lee J. The relationship between body fat  
470 mass percentiles and inflammation in children. *Obesity (Silver Spring)*. 2014; 22:1332–1336.  
471 <https://doi.org/10.1002/oby.20710> PMID: 24464763
- 472 46. Skinner AC, Steiner MJ, Henderson FW, Perrin EM. Multiple markers of inflammation and  
473 weight status: cross-sectional analyses throughout childhood. *Pediatrics*. 2010; 125: e801-809.  
474 <https://doi.org/10.1542/peds.2009-2182> PMID: 20194272
- 475 47. Perrin EM, O’Shea TM, Skinner AC, Bose C, Allred EN, Fichorova RN, et al. Elevations of  
476 inflammatory proteins in neonatal blood are associated with obesity and overweight among 2-year-  
477 old children born extremely premature. *Pediatr Res*. 2018; 83:1110–1119.  
478 <https://doi.org/10.1038/pr.2017.313> PMID: 29244802
- 479 48. Tabas I, Glass CK. Anti-inflammatory therapy in chronic disease: challenges and  
480 opportunities. *Science*. 2013; 339:166–172. <https://doi.org/10.1126/science.1230720>



- 481 PMID: 23307734
- 482 49. Esser N, Paquot N, Scheen AJ. Anti-inflammatory agents to treat or prevent type 2 diabetes,  
483 metabolic syndrome and cardiovascular disease. *Expert Opin Investig Drugs*. 2015; 24:283–307.  
484 <https://doi.org/10.1517/13543784.2015.974804> PMID: 25345753
- 485 50. Oh J-Y, Sung Y-A, Lee HJ. The visceral adiposity index as a predictor of insulin resistance in  
486 young women with polycystic ovary syndrome. *Obesity (Silver Spring)*. 2013; 21:1690–1694.  
487 <https://doi.org/10.1002/oby.20096> PMID: 23585246
- 488 51. Coppack SW. Pro-inflammatory cytokines and adipose tissue. *Proc Nutr Soc*. 2001; 60:349–  
489 356. <https://doi.org/10.1079/pns2001110> PMID: 11681809
- 490 52. Dandona P, Aljada A, Bandyopadhyay A. Inflammation: the link between insulin resistance,  
491 obesity and diabetes. *Trends Immunol*. 2004; 25:4–7. <https://doi.org/10.1016/j.it.2003.10.013> PMID:  
492 14698276
- 493 53. Pradhan AD, Manson JE, Rifai N, Buring JE, Ridker PM. C-reactive protein, interleukin 6,  
494 and risk of developing type 2 diabetes mellitus. *JAMA*. 2001; 286:327–334.  
495 <https://doi.org/10.1001/jama.286.3.327> PMID: 11466099
- 496 54. Hotamisligil GS, Shargill NS, Spiegelman BM. Adipose expression of tumor necrosis factor-  
497 alpha: direct role in obesity-linked insulin resistance. *Science*. 1993; 259:87–91.  
498 <https://doi.org/10.1126/science.7678183> PMID: 7678183
- 499 55. Esposito K, Nappo F, Marfella R, Giugliano G, Giugliano F, Ciotola M, et al. Inflammatory  
500 cytokine concentrations are acutely increased by hyperglycemia in humans: role of oxidative stress.  
501 *Circulation*. 2002; 106:2067–2072. <https://doi.org/10.1161/01.cir.0000034509.14906.ae> PMID:  
502 12379575
- 503 56. Goyal R, Faizy AF, Siddiqui SS, Singhai M. Evaluation of TNF- $\alpha$  and IL-6 Levels in Obese  
504 and Non-obese Diabetics: Pre- and Postinsulin Effects. *N Am J Med Sci*. 2012; 4:180–184.  
505 <https://doi.org/10.4103/1947-2714.94944> PMID: 22536561
- 506 57. Williams MD, Nadler JL. Inflammatory mechanisms of diabetic complications. *Curr Diab*  
507 *Rep*. 2007; 7:242–248. <https://doi.org/10.1007/s11892-007-0038-y> PMID: 17547842
- 508 58. Malin SK, Kirwan JP, Sia CL, González F. Pancreatic  $\beta$ -cell dysfunction in polycystic ovary  
509 syndrome: role of hyperglycemia-induced nuclear factor- $\kappa$ B activation and systemic inflammation.  
510 *Am J Physiol Endocrinol Metab*. 2015; 308:E770-777. <https://doi.org/10.1152/ajpendo.00510.2014>  
511 PMID: 25714674
- 512 59. Kriketos AD, Greenfield JR, Peake PW, Furler SM, Denyer GS, Charlesworth JA, et al.  
513 Inflammation, insulin resistance, and adiposity: a study of first-degree relatives of type 2 diabetic  
514 subjects. *Diabetes Care*. 2004; 27:2033–2040. <https://doi.org/10.2337/diacare.27.8.2033> PMID:  
515 15277436

- 516 60. Wu D, Dawson N a. J, Levings MK. Obesity-Associated Adipose Tissue Inflammation and  
517 Transplantation. *Am J Transplant*. 2016; 16:743–750. <https://doi.org/10.1111/ajt.13578> PMID:  
518 26755439
- 519 61. Lionett S, Kiel IA, Røsbjorgen R, Lydersen S, Larsen S, Moholdt T. Absent Exercise-Induced  
520 Improvements in Fat Oxidation in Women With Polycystic Ovary Syndrome After High-Intensity  
521 Interval Training. *Front Physiol*. 2021; 12:649794. <https://doi.org/10.3389/fphys.2021.649794> PMID:  
522 33841184
- 523 62. Zhang S, Tu H, Zhu J, Liang A, Huo P, Shan K, et al. Dendrobium nobile Lindl.  
524 polysaccharides improve follicular development in PCOS rats. *Int J Biol Macromol*. 2020; 149:826–  
525 834. <https://doi.org/10.1016/j.ijbiomac.2020.01.196> PMID: 31978473
- 526 63. Escobar-Morreale HF. Polycystic ovary syndrome: definition, aetiology, diagnosis and  
527 treatment. *Nat Rev Endocrinol*. 2018; 14:270–284. <https://doi.org/10.1038/nrendo.2018.24> PMID:  
528 29569621
- 529 64. Sirotkin AV. Cytokines: signalling molecules controlling ovarian functions. *Int J Biochem*  
530 *Cell Biol*. 2011; 43:857–861. <https://doi.org/10.1016/j.biocel.2011.03.001> PMID: 21382504
- 531 65. Brännström M, Norman RJ. Involvement of leukocytes and cytokines in the ovulatory process  
532 and corpus luteum function. *Hum Reprod*. 1993; 8:1762–1775.  
533 <https://doi.org/10.1093/oxfordjournals.humrep.a137929> PMID: 8300842
- 534 66. Field SL, Dasgupta T, Cummings M, Orsi NM. Cytokines in ovarian folliculogenesis, oocyte  
535 maturation and luteinisation. *Mol Reprod Dev*. 2014; 81:284–314. <https://doi.org/10.1002/mrd.22285>  
536 PMID: 24273059
- 537 67. Wang D, Weng Y, Zhang Y, Wang R, Wang T, Zhou J, et al. Exposure to hyperandrogen  
538 drives ovarian dysfunction and fibrosis by activating the NLRP3 inflammasome in mice. *Sci Total*  
539 *Environ*. 2020; 745:141049. <https://doi.org/10.1016/j.scitotenv.2020.141049> PMID: 32758727
- 540 68. Lawrence T, Gilroy DW, Colville-Nash PR, Willoughby DA. Possible new role for NF-  
541 kappaB in the resolution of inflammation. *Nat Med*. 2001; 7:1291–1297.  
542 <https://doi.org/10.1038/nm1201-1291> PMID: 11726968
- 543 69. Baeuerle PA, Baltimore D. I kappa B: a specific inhibitor of the NF-kappa B transcription  
544 factor. *Science*. 1988; 242:540–546. <https://doi.org/10.1126/science.3140380> PMID: 3140380
- 545 70. Karin M, Ben-Neriah Y. Phosphorylation meets ubiquitination: the control of NF-[kappa]B  
546 activity. *Annu Rev Immunol*. 2000; 18:621–663. <https://doi.org/10.1146/annurev.immunol.18.1.621>  
547 PMID: 10837071
- 548 71. Huang X, Hao C, Shen X, Zhang Y, Liu X. RUNX2, GPX3 and PTX3 gene expression  
549 profiling in cumulus cells are reflective oocyte/embryo competence and potentially reliable predictors  
550 of embryo developmental competence in PCOS patients. *Reprod Biol Endocrinol*. 2013; 11:109.  
551 <https://doi.org/10.1186/1477-7827-11-109> PMID: 24279306

- 552 72. Huang X, Hao C, Shen X, Liu X, Shan Y, Zhang Y, et al. Differences in the transcriptional  
553 profiles of human cumulus cells isolated from MI and MII oocytes of patients with polycystic ovary  
554 syndrome. *Reproduction*. 2013; 145:597–608. <https://doi.org/10.1530/REP-13-0005> PMID:  
555 23603633
- 556 73. Shen H, Liang Z, Zheng S, Li X. Pathway and network-based analysis of genome-wide  
557 association studies and RT-PCR validation in polycystic ovary syndrome. *Int J Mol Med*. 2017;  
558 40:1385–1396. <https://doi.org/10.3892/ijmm.2017.3146> PMID: 28949383
- 559 74. Khichar A, Gupta S, Mishra S, Meena M. Assessment of Inflammatory Markers in Women  
560 with PCOS and their Correlation with Insulin Resistance. *Clin Lab*. 2021; 67:  
561 <https://doi.org/10.7754/Clin.Lab.2021.210310> PMID: 34758238
- 562 75. Yang S, Li Q, Song Y, Tian B, Cheng Q, Qing H, et al. Serum complement C3 has a stronger  
563 association with insulin resistance than high-sensitivity C-reactive protein in women with polycystic  
564 ovary syndrome. *Fertil Steril*. 2011; 95:1749–1753. <https://doi.org/10.1016/j.fertnstert.2011.01.136>  
565 PMID: 21316661
- 566 76. Atiomo W, Shafiee MN, Chapman C, Metzler VM, Abouzeid J, Latif A, et al. Expression of  
567 NAD(P)H quinone dehydrogenase 1 (NQO1) is increased in the endometrium of women with  
568 endometrial cancer and women with polycystic ovary syndrome. *Clin Endocrinol (Oxf)*. 2017;  
569 87:557–565. <https://doi.org/10.1111/cen.13436> PMID: 28748640

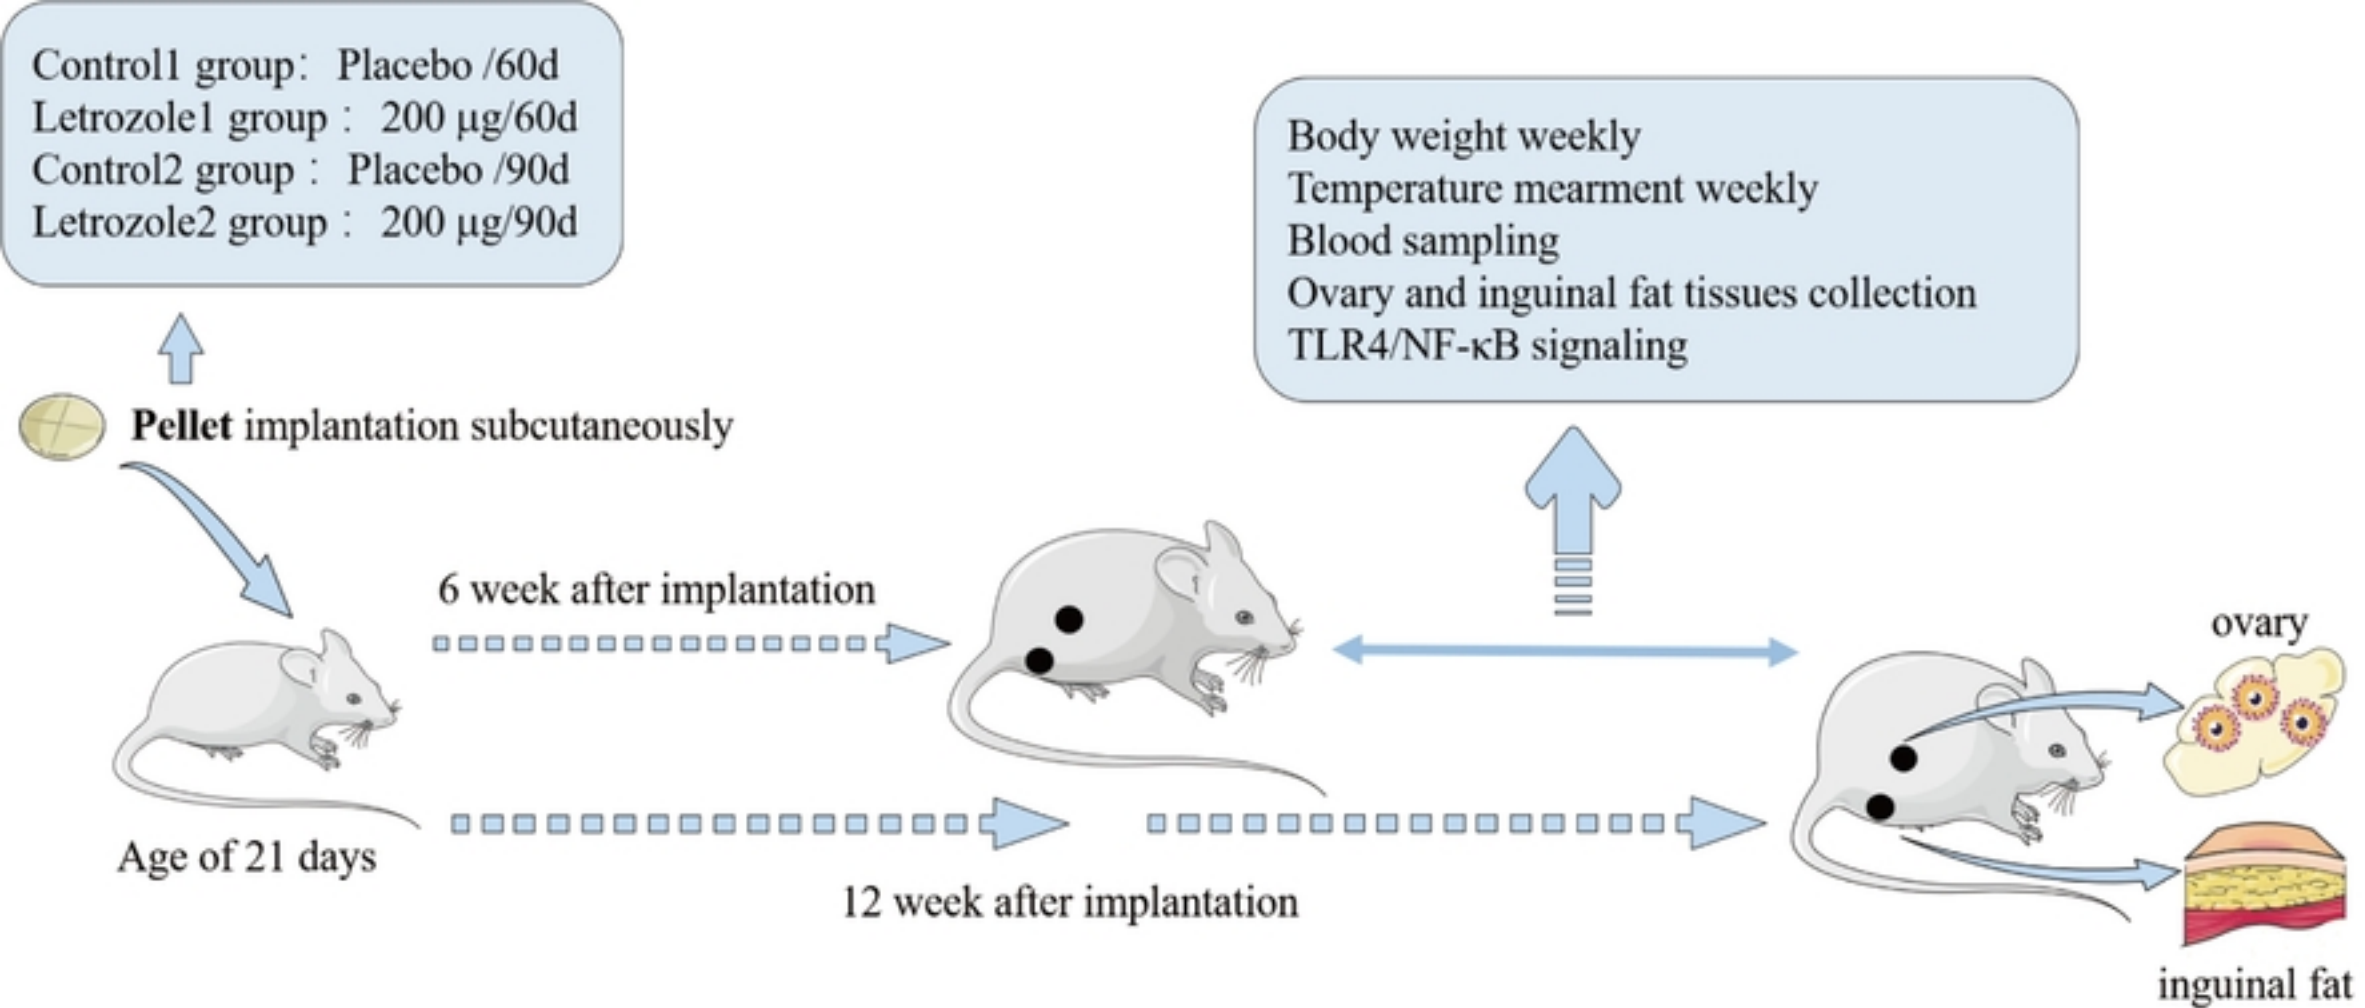

Figure1



**A.**

\* Con 1 vs LET1  
Con2 vs LET2

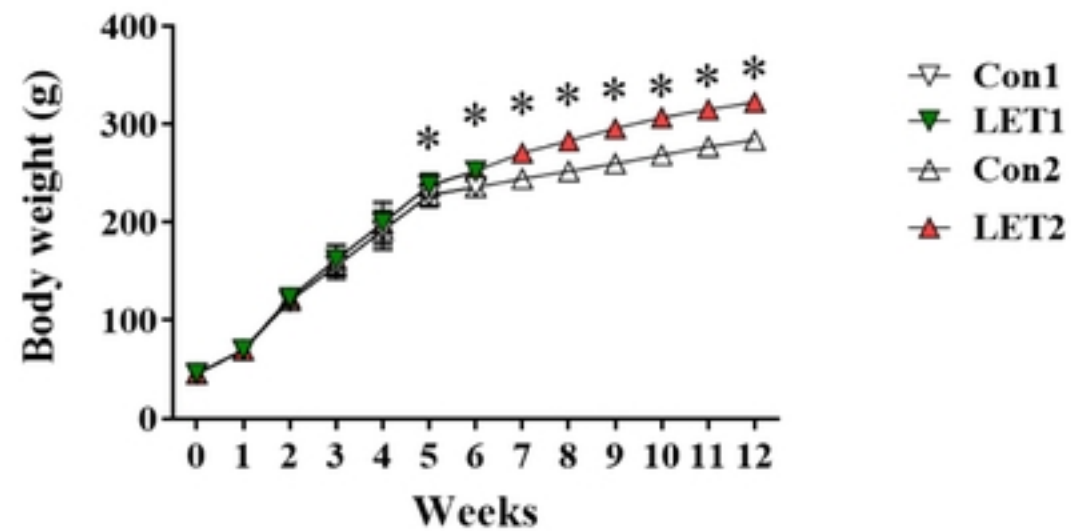**B.**

\* Con 2 vs LET2

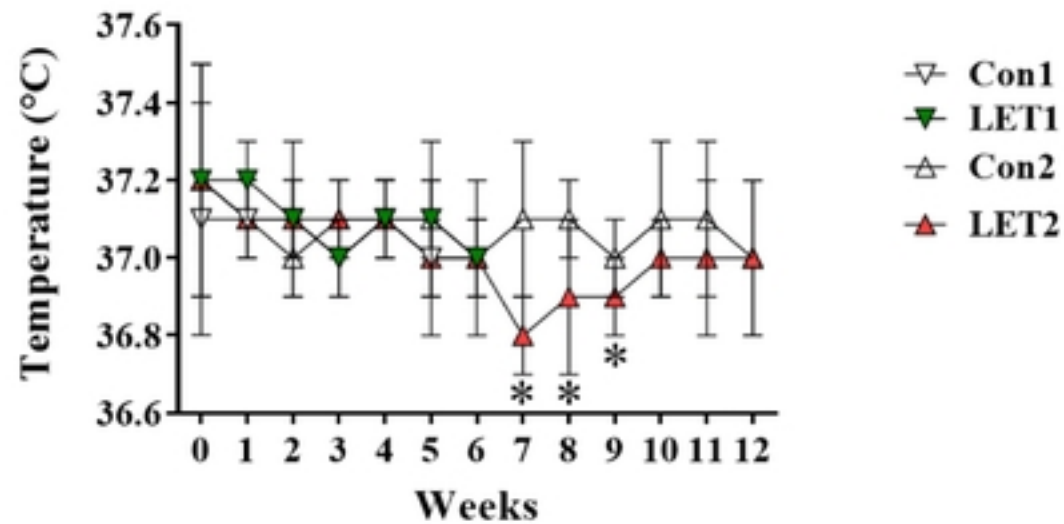**Figure2**

**A.**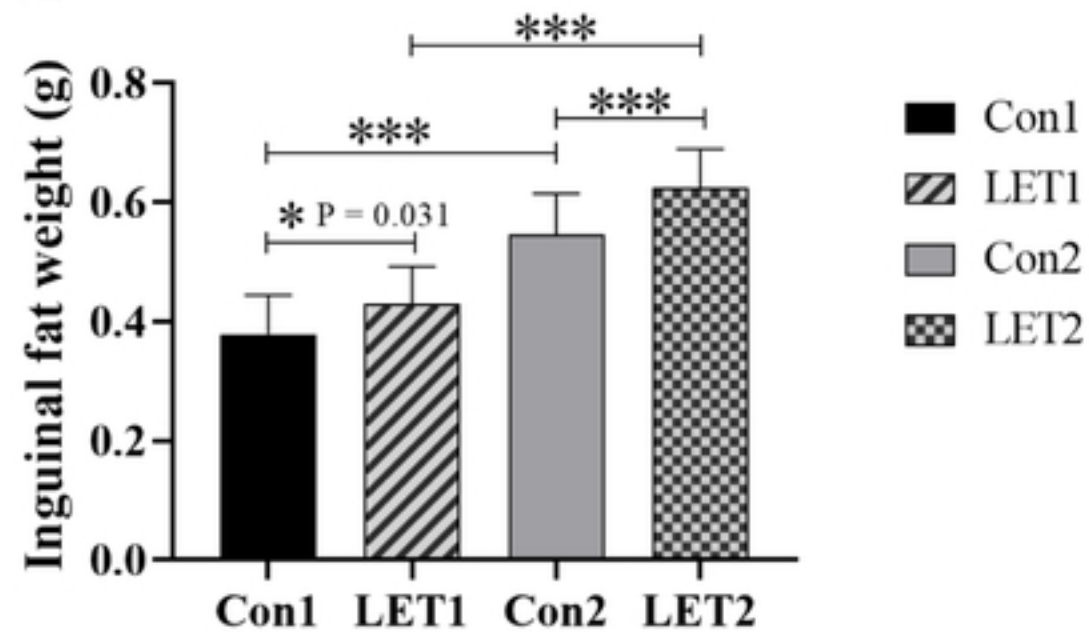**B.**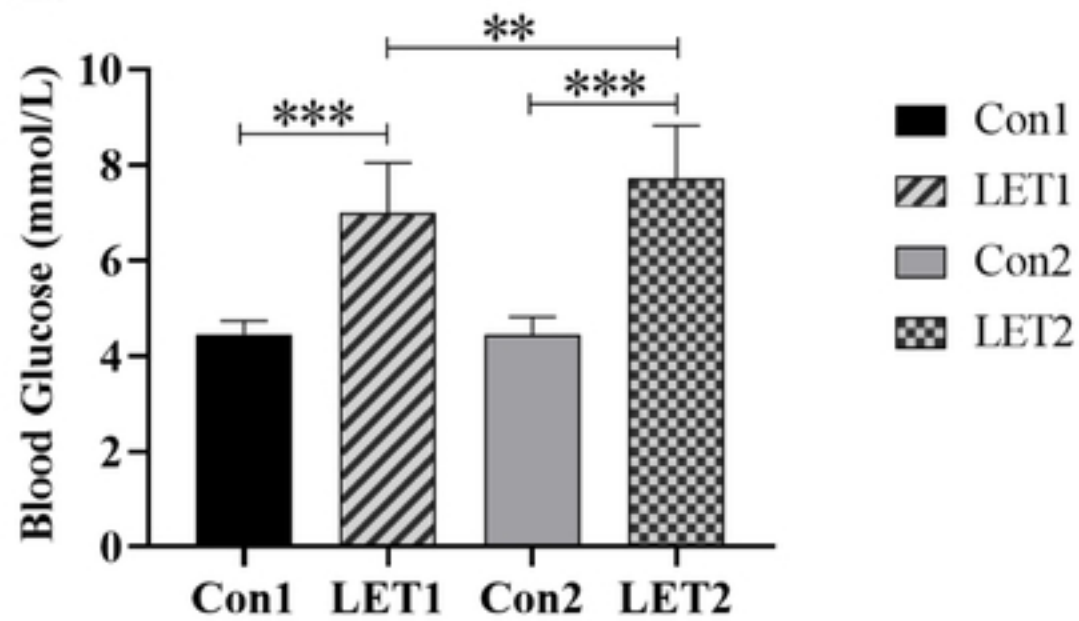

Figure3



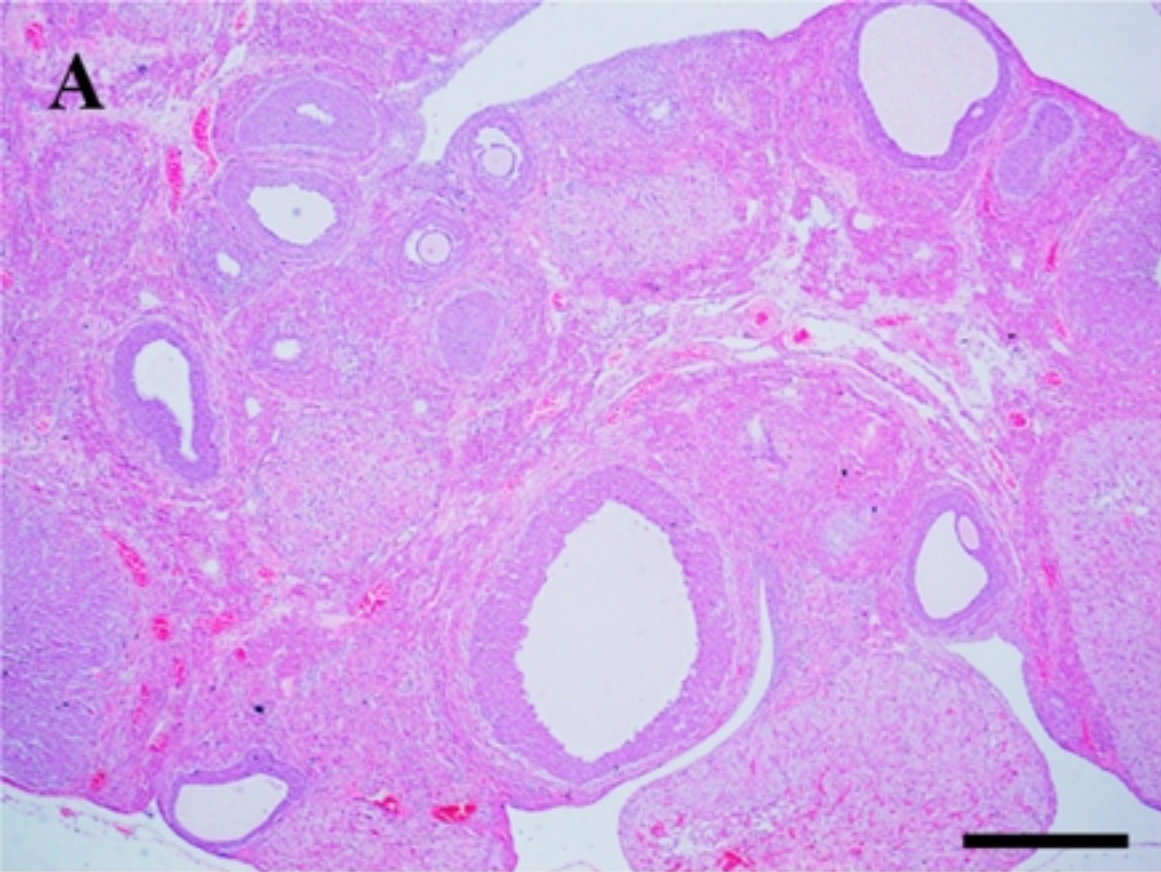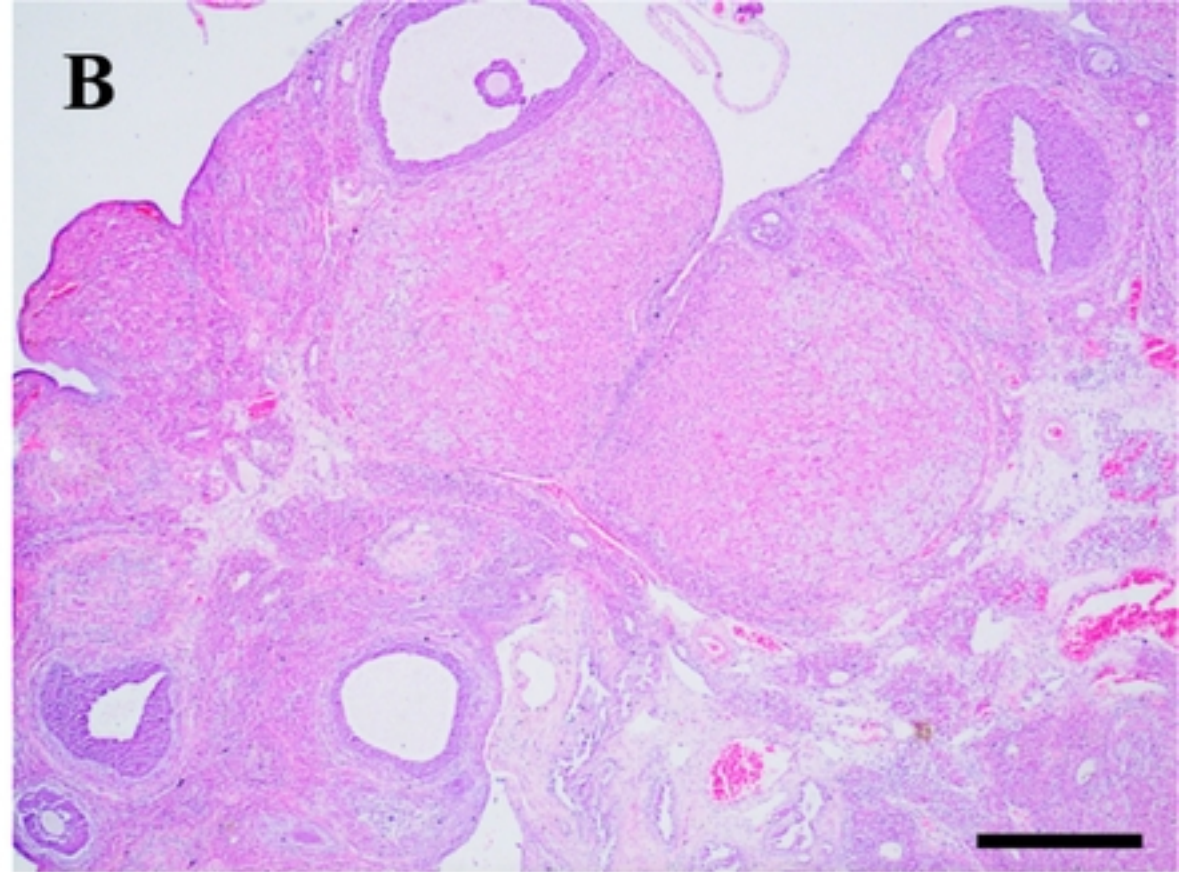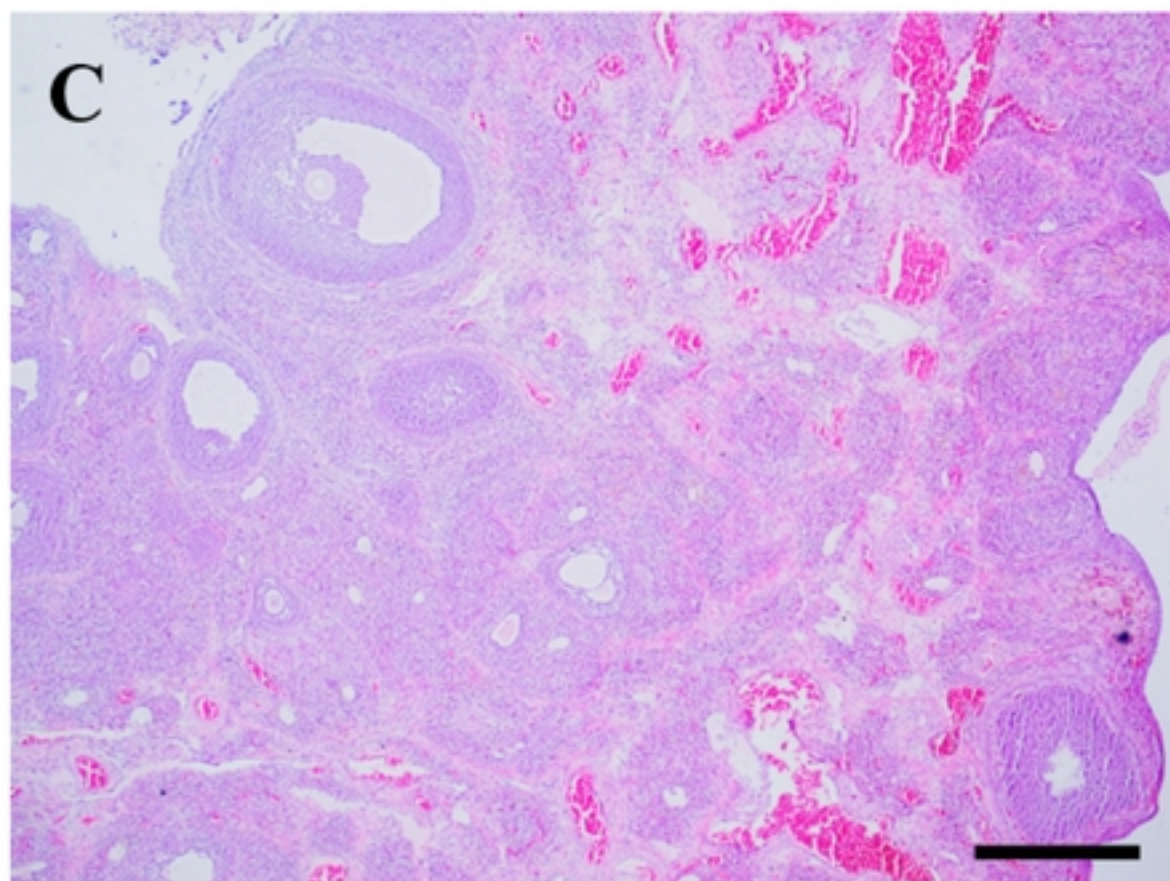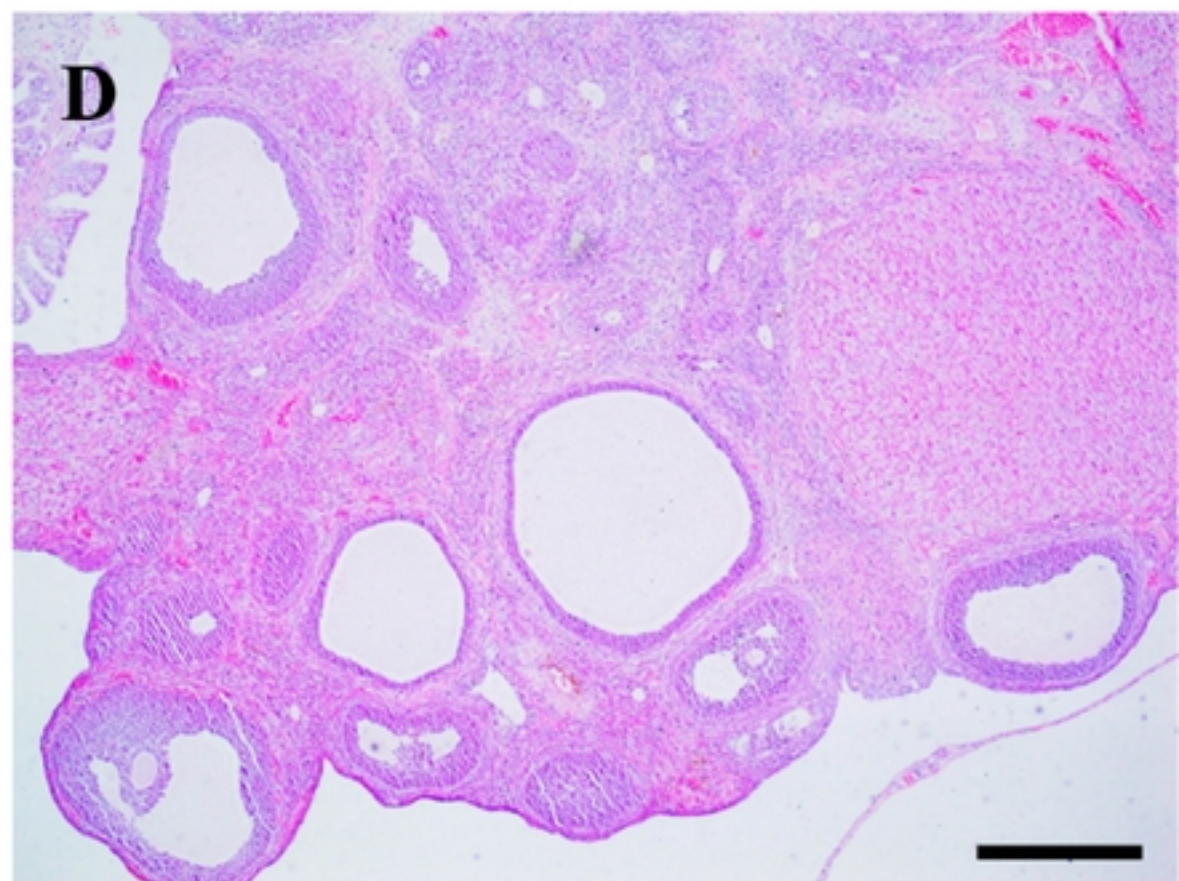

Figure4



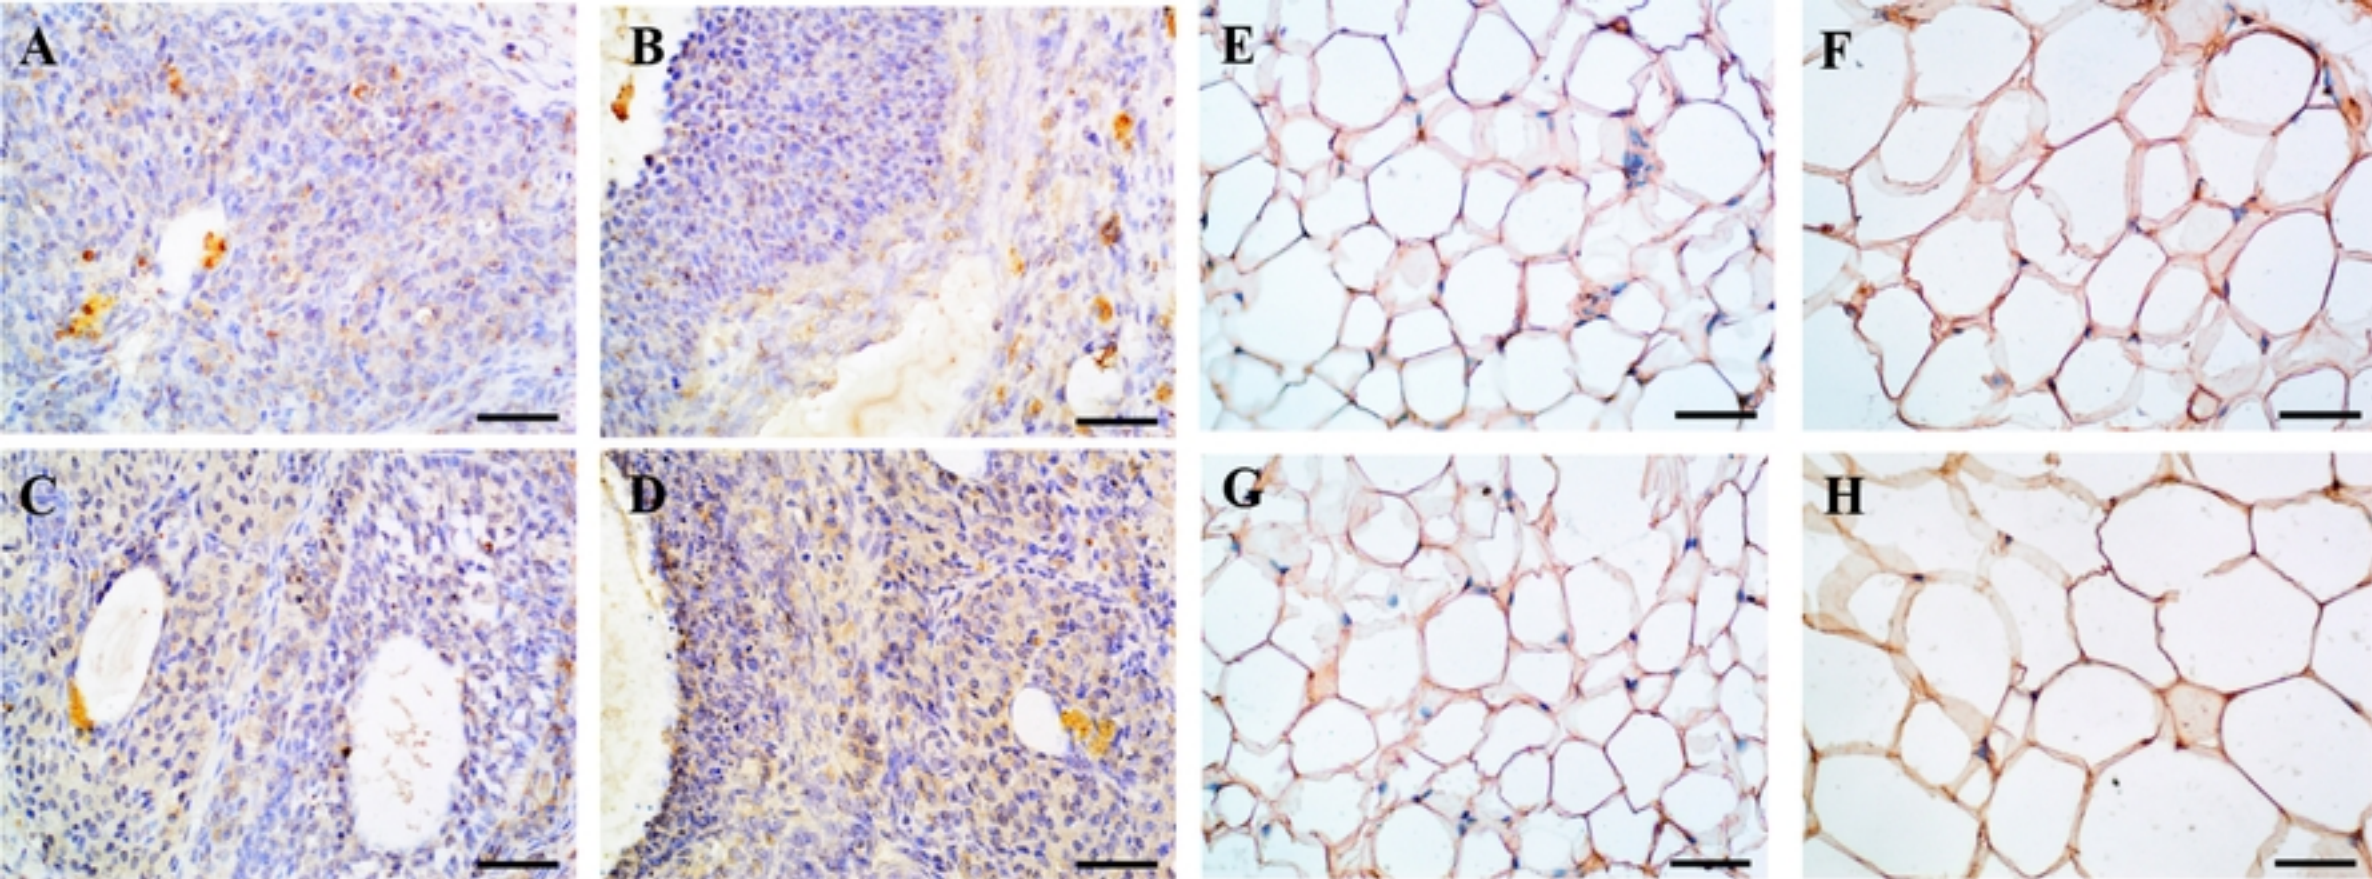

**I**

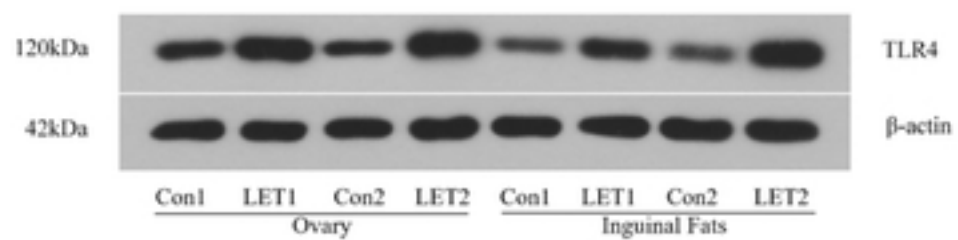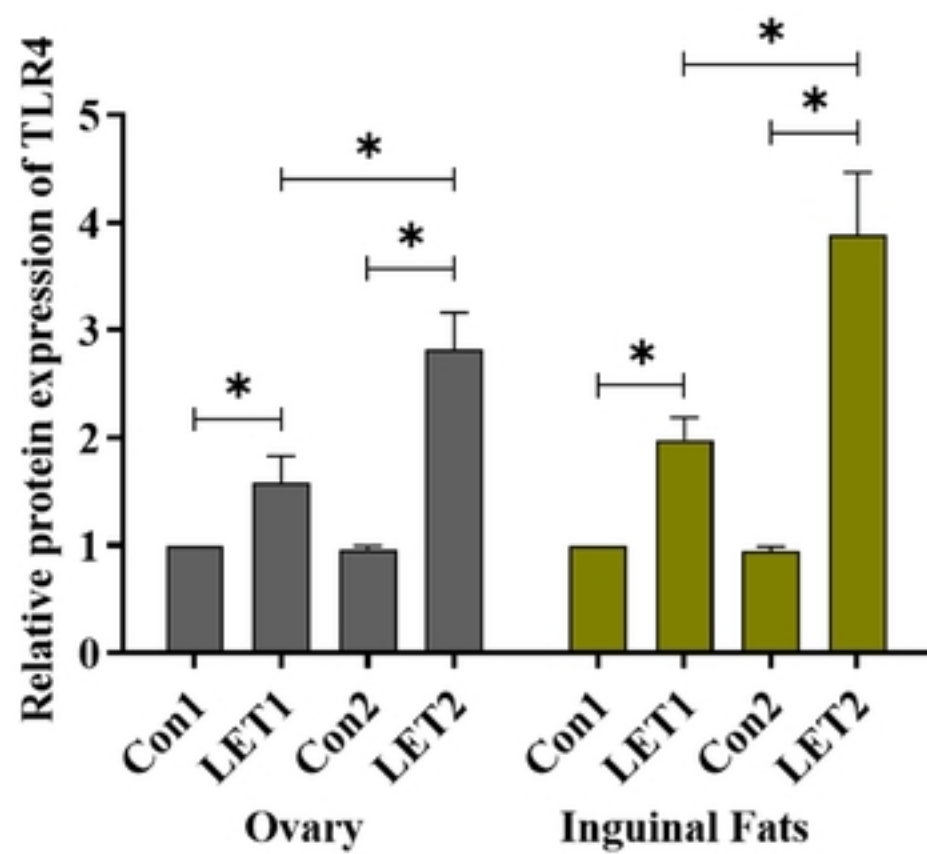

Figure5



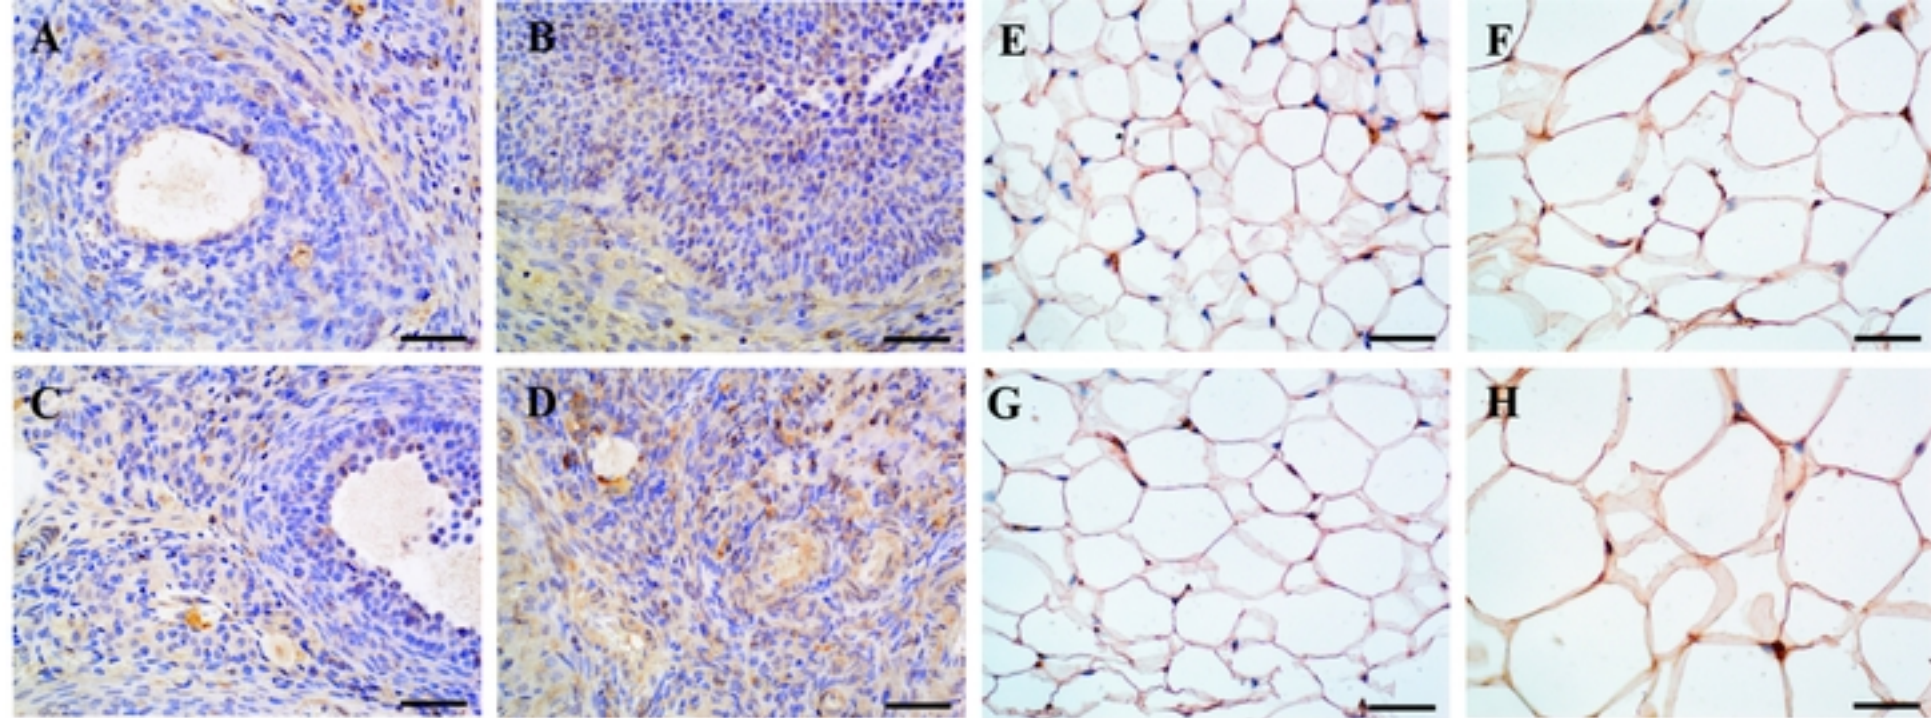

**I**

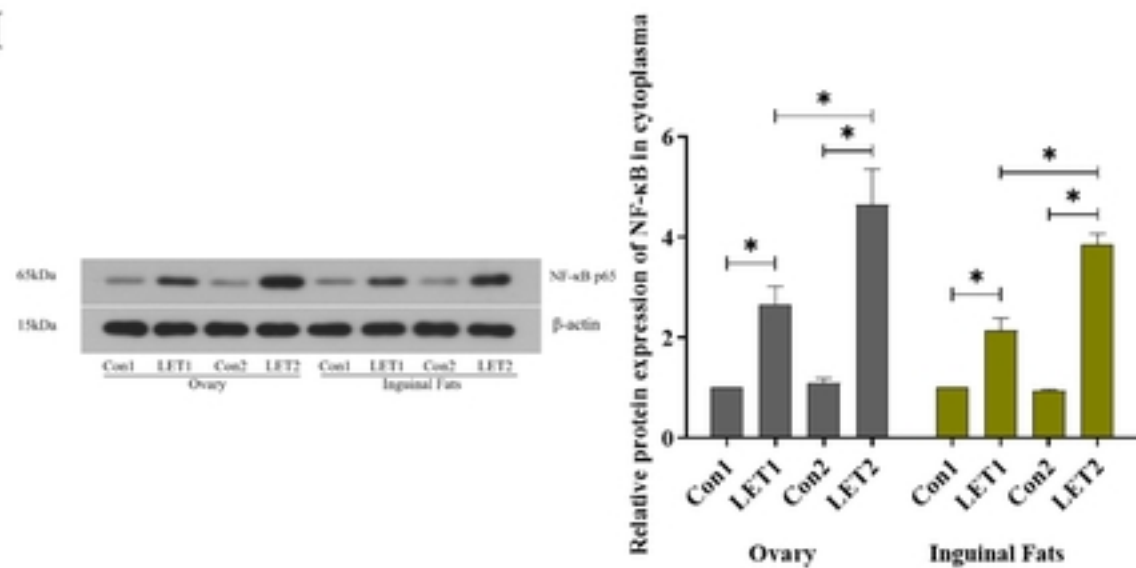

**J**

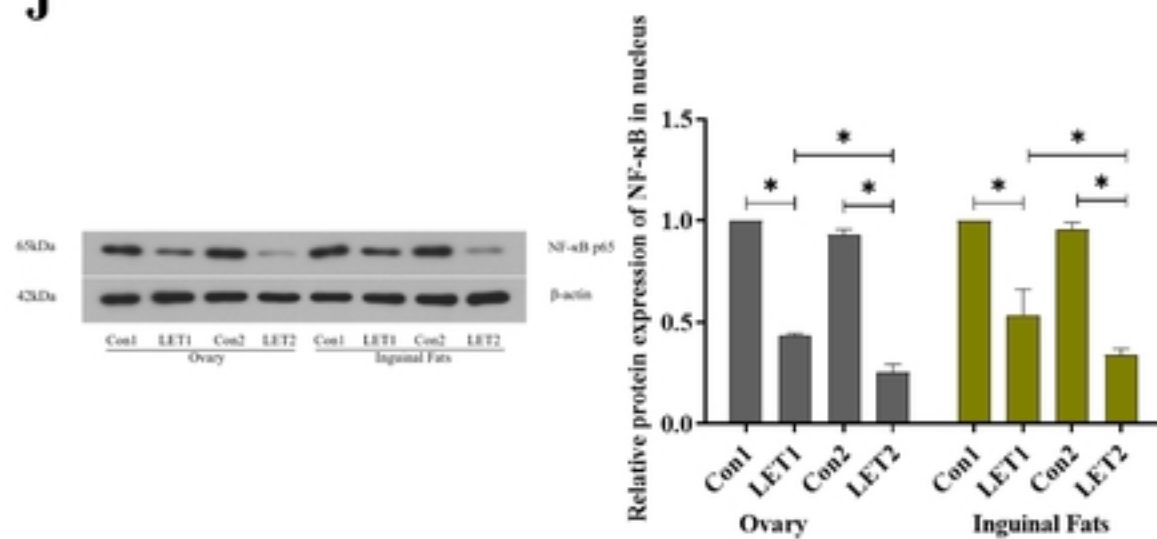

Figure6

**A**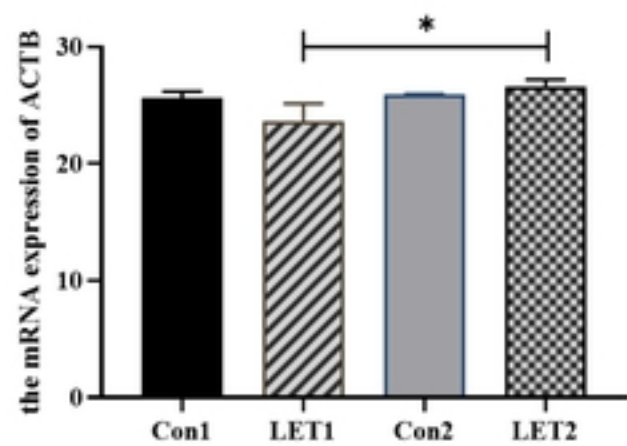**B**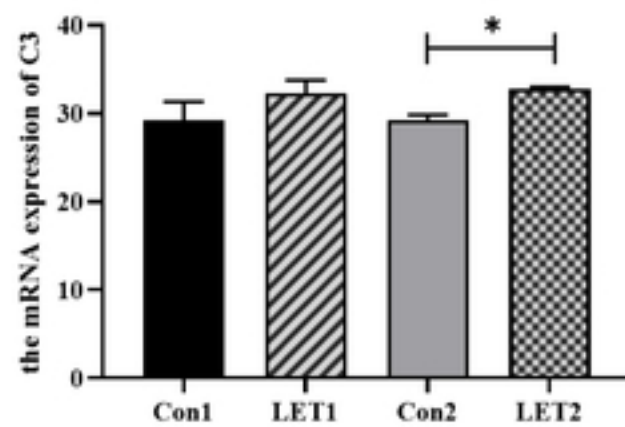**C**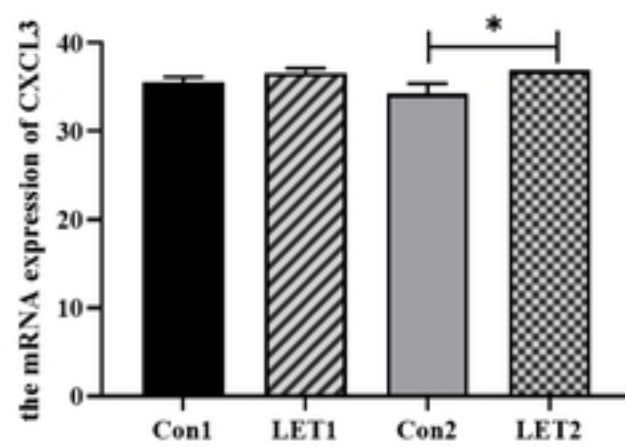**D**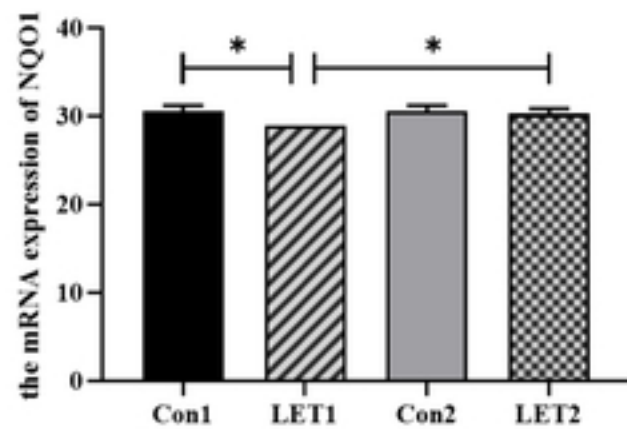**E**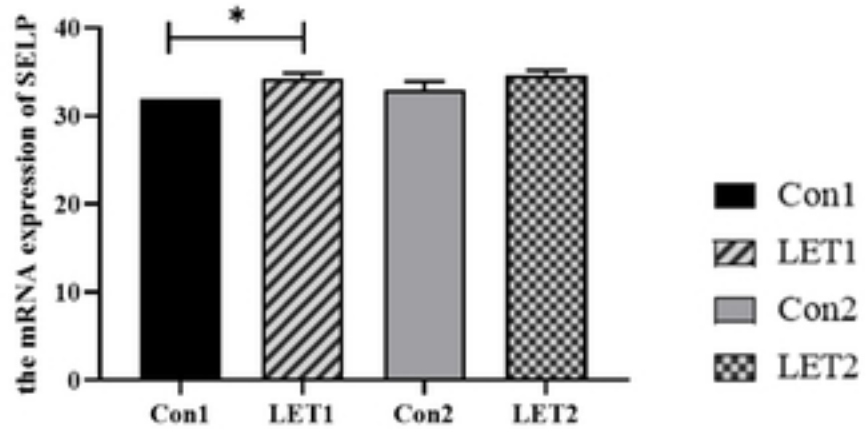

■ Con1  
▨ LET1  
■ Con2  
▩ LET2

**Figure7**
